# Supplementary material for: When topology meets geometry: topological motifs and uniformity of atomic sublattices in inorganic crystals
Source: Royal Society of Chemistry journal article supplement (doi:10.1039/d4ce01009d), 2024-01-01
Supplement: d4ce01009d1.pdf [file d4ce01009d1.pdf]

## **When topology meets geometry: topological motifs and uniformity of atomic sublattices in inorganic crystals**

Inna V. Mdrish<sup>a</sup> and Vladislav A. Blatov<sup>\*a</sup>

---

<sup>a</sup> *Samara Center for Theoretical Materials Science (SCTMS), Samara State Technical University, Molodogvardeyskaya St. 244, 443100 Samara, Russian Federation.*

\*Email: [blatov@topospro.com](mailto:blatov@topospro.com).

## **Supplementary Information**

Table S1. Topological types of boron substructures in inorganic borides.

| Topological type | Occurrence |     | B/M ratio | Space group | Borides                   |                                                                                                                                                                |
|------------------|------------|-----|-----------|-------------|---------------------------|----------------------------------------------------------------------------------------------------------------------------------------------------------------|
| <b>bnn</b>       | 235        | 99  | 58        | 0.5         | <i>P6/mmm</i>             | M(1)M(2) <sub>3</sub> B <sub>2</sub>                                                                                                                           |
|                  |            |     | 24        |             | <i>C2/m</i>               | M(1) = REM, <i>d</i> -metals, An, Ca;                                                                                                                          |
|                  |            |     | 4         |             | <i>P-3</i>                | M(2) = <i>d</i> -metals                                                                                                                                        |
|                  |            |     | 11        |             | <i>P-62m</i>              | NdRh <sub>3</sub> B <sub>2</sub> ; (M <sub>0.5</sub> Rh <sub>0.5</sub> )Rh <sub>3</sub> B <sub>2</sub><br>M = Ln, Y                                            |
|                  |            |     | 1         |             | <i>Cmmm</i>               | TbCo <sub>3</sub> B <sub>2</sub>                                                                                                                               |
|                  |            |     | 1         |             | <i>P6<sub>3</sub>/mmc</i> | Ca <sub>0.67</sub> Pt <sub>3</sub> B <sub>2</sub>                                                                                                              |
|                  |            | 65  | 38        | 0.2         | <i>P6/mmm</i>             | M(1)M(2) <sub>4</sub> B<br>M(1) = REM*, U, Ca;<br>M(2) = Fe, Co, Ni, Pt                                                                                        |
|                  |            |     |           |             |                           | (M(1) <sub>1-x</sub> M(2) <sub>x</sub> )(M(3) <sub>4-x</sub> M(4) <sub>x</sub> )B<br>M(1), M(2) = REM;<br>M(3), M(4) = Fe, Co, Ni                              |
|                  |            |     |           |             |                           | Eu <sub>3</sub> Ni <sub>7</sub> B <sub>2</sub>                                                                                                                 |
|                  |            | 25  | 16        | 0.125       | <i>P6/mmm</i>             | M(1) <sub>3</sub> M(2) <sub>13</sub> B <sub>2</sub><br>M(1) = Ln, Y; M(2) = Co, Ni                                                                             |
|                  |            |     |           |             |                           | M <sub>3</sub> (Ni <sub>13-x</sub> Co <sub>x</sub> )B <sub>2</sub> M = Nd, Y                                                                                   |
|                  |            | 15  | 14        | 0.29        | <i>P6/mmm</i>             | M <sub>3</sub> Co <sub>11</sub> B <sub>4</sub> M = Ln, Y                                                                                                       |
|                  |            |     |           |             |                           | <i>P-62m</i>                                                                                                                                                   |
|                  |            | 14  |           | 0.57        | <i>P6/mmm</i>             | M <sub>0.5</sub> Rh <sub>3</sub> B <sub>2</sub> M = Ln, Y                                                                                                      |
|                  |            | 11  |           | 0.33        | <i>P6/mmm</i>             | M <sub>2</sub> Co <sub>7</sub> B <sub>3</sub> M = Ln, Y                                                                                                        |
|                  |            | 4   | 3         | 0.25        | <i>P6/mmm</i>             | M(1) <sub>5</sub> M(2) <sub>19</sub> B <sub>6</sub><br>M(1) = Lu, Pr, Nd; M(2) = Co, Ni                                                                        |
|                  |            |     |           |             |                           | NaPt <sub>3</sub> B                                                                                                                                            |
|                  |            | 1   |           | 0.15        | <i>P6/mmm</i>             | Nd <sub>5</sub> Co <sub>21</sub> B <sub>4</sub>                                                                                                                |
|                  |            | 1   |           | 0.4         | <i>Pbam</i>               | Li <sub>2</sub> Rh <sub>3</sub> B <sub>2</sub>                                                                                                                 |
| <b>fcu</b>       | 209        | 195 | 101       | 0.0625      | <i>P4<sub>2</sub>/mnm</i> | M(1) <sub>2</sub> (M(2) <sub>x</sub> M(3) <sub>y</sub> M(4) <sub>z</sub> ) <sub>14</sub> B<br>M(1) = Ln, Y;<br>M(2), M(3), M(4) = <i>d</i> -metals, Al, Ga, Ge |
|                  |            |     |           |             |                           | M(1) <sub>2-x</sub> M(2) <sub>x</sub> M(3) <sub>14</sub> B<br>M(1), M(2) = REM, Zr, Hf, Th;<br>M(3) = Fe, Co                                                   |
|                  |            |     |           |             |                           | M(1) <sub>2</sub> M(2) <sub>14</sub> B<br>M(1) = REM, Th; M(2) = Fe, Co                                                                                        |
|                  |            |     |           |             |                           | M(1) <sub>2-x</sub> M(2) <sub>x</sub> (M(3)M(4)M(5)) <sub>14</sub> B<br>M(1), M(2) = Ln, Ti, Zr, Hf;<br>M(3), M(4), M(5) = <i>d</i> -metals, Al                |
|                  |            |     |           |             |                           | M(1) <sub>2</sub> Fe <sub>12</sub> M(2) <sub>2</sub> B<br>M(1) = Ln, Y;<br>M(2) = <i>d</i> -metals, Al, Ga                                                     |
|                  |            |     |           |             |                           | M <sub>2</sub> (Fe <sub>7</sub> Co <sub>7</sub> )B M = REM                                                                                                     |

|            |     |     |      |               |                                                                                                                     |                                                                                                                                                                                          |
|------------|-----|-----|------|---------------|---------------------------------------------------------------------------------------------------------------------|------------------------------------------------------------------------------------------------------------------------------------------------------------------------------------------|
|            |     |     | 1    |               | <i>P1</i>                                                                                                           | Nd <sub>2</sub> Fe <sub>14</sub> B                                                                                                                                                       |
|            |     | 4   |      | 0.125         | <i>Fm-3m</i>                                                                                                        | M(1) <sub>2</sub> M(2) <sub>6-x</sub> M(3) <sub>x</sub> B<br>M = <i>d</i> -metals                                                                                                        |
|            |     | 4   | 3    | 1             | <i>Fm-3m</i>                                                                                                        | MB M = Zr, Hf, Pu                                                                                                                                                                        |
|            |     |     | 1    |               | <i>F-43m</i>                                                                                                        | TiB                                                                                                                                                                                      |
|            |     | 3   |      | 0.5           | <i>Pnmm</i>                                                                                                         | Pd <sub>2</sub> B                                                                                                                                                                        |
|            |     |     |      |               | <i>Fm-3m</i>                                                                                                        | Be <sub>2</sub> B                                                                                                                                                                        |
|            |     |     |      |               | <i>F-43m</i>                                                                                                        | AlBeB                                                                                                                                                                                    |
|            |     | 1   |      | 0.25          | <i>P4/nmm</i>                                                                                                       | Be <sub>4</sub> B                                                                                                                                                                        |
|            |     | 1   |      | 0.17          | <i>R3m</i>                                                                                                          | Li <sub>4</sub> Ge <sub>2</sub> B                                                                                                                                                        |
|            |     | 1   |      | 0.08          | <i>I4<sub>1</sub>/acd</i>                                                                                           | Ga <sub>8</sub> Ir <sub>4</sub> B                                                                                                                                                        |
| <b>reo</b> | 106 | 100 | 35   | 0.26          | <i>Fm-3m</i>                                                                                                        | M(1) <sub>x</sub> M(2) <sub>23-x</sub> B <sub>6</sub><br>M(1) = <i>d</i> -, <i>p</i> -metals, Li, Mg, U;<br>M(2) = <i>d</i> -metals                                                      |
|            |     |     | 32   |               |                                                                                                                     | M(1) <sub>2</sub> M(2) <sub>21</sub> B <sub>6</sub><br>M(1) = REM, <i>d</i> -, <i>p</i> -metals, Ca, U; M(2) = Co, Ni                                                                    |
|            |     |     | 15   |               |                                                                                                                     | M(1) <sub>0.8-2.72</sub> M(2) <sub>19.96-22</sub> B <sub>6</sub><br>M(1) = <i>d</i> -metals, Ln, U;<br>M(2) = Ni, Fe                                                                     |
|            |     |     | 14   |               |                                                                                                                     | M(1) <sub>3</sub> M(2) <sub>20</sub> B <sub>6</sub><br>M(1) = <i>d</i> -metals, Al; M(2) = Co, Ni                                                                                        |
|            |     |     | 2    |               |                                                                                                                     | MCo <sub>22</sub> B <sub>6</sub> M = In, Sb                                                                                                                                              |
|            |     |     | 2    |               |                                                                                                                     | Fe <sub>10.66</sub> Nb <sub>0.84</sub> B <sub>3</sub> ; Mn <sub>4.547</sub> Co <sub>18.453</sub> B <sub>6</sub>                                                                          |
|            |     |     | 4    |               |                                                                                                                     | 0.3                                                                                                                                                                                      |
|            |     | 1   | 0.27 | <i>Fm-3m</i>  | Cr <sub>7.9</sub> Ir <sub>14.1</sub> B <sub>6</sub>                                                                 |                                                                                                                                                                                          |
|            |     | 1   | 0.16 | <i>R-3m</i>   | Sm <sub>2</sub> Fe <sub>17</sub> B <sub>3</sub>                                                                     |                                                                                                                                                                                          |
| <b>pcu</b> | 93  | 60  | 47   | 0.25          | <i>Pm-3m</i>                                                                                                        | M(1)M(2) <sub>3</sub> B<br>M(1) = REM, <i>p</i> -metals, Zr, Hf, U, Th;<br>M(2) = <i>d</i> -metals                                                                                       |
|            |     |     | 11   |               | <i>P4mm</i>                                                                                                         | MPt <sub>3</sub> B M = Ln, U                                                                                                                                                             |
|            |     |     | 2    |               | <i>Pm-3m</i>                                                                                                        | Er(M <sub>3-x</sub> Rh <sub>x</sub> )B M = Pd, Pt                                                                                                                                        |
|            |     | 25  | 14   | 0.5           | <i>I4/mcm</i>                                                                                                       | M(1) <sub>2-x</sub> M(2) <sub>x</sub> B M = <i>d</i> -metals                                                                                                                             |
|            |     |     | 7    |               |                                                                                                                     | M(1)M(2)B M = <i>d</i> -metals                                                                                                                                                           |
|            |     |     | 4    |               |                                                                                                                     | M <sub>2</sub> B M = Ta, Cr, Mo, W                                                                                                                                                       |
|            |     | 2   | 0.3  | <i>Cmmm</i>   | Li <sub>1.1</sub> Mg <sub>3.9</sub> Rh <sub>8</sub> B <sub>4</sub> ; Zn <sub>5</sub> Rh <sub>8</sub> B <sub>4</sub> |                                                                                                                                                                                          |
|            |     | 2   | 0.2  | <i>P4/mmm</i> | LaM <sub>2</sub> Al <sub>2</sub> B M = Ru, Os                                                                       |                                                                                                                                                                                          |
|            |     | 1   | 0.28 | <i>P4/mmm</i> | Al <sub>3</sub> Ru <sub>4</sub> B <sub>2</sub>                                                                      |                                                                                                                                                                                          |
|            |     | 1   | 0.27 | <i>Pm-3m</i>  | YbRh <sub>2.67</sub> B                                                                                              |                                                                                                                                                                                          |
|            |     | 1   | 0.25 | <i>Fm-3m</i>  | YPd <sub>7</sub> B <sub>2</sub>                                                                                     |                                                                                                                                                                                          |
|            |     | 1   | 0.14 | <i>I4/mcm</i> | Nb <sub>5</sub> Ge <sub>2</sub> B                                                                                   |                                                                                                                                                                                          |
| <b>sve</b> | 65  | 30  |      | 0.25          | <i>P4/mbm</i>                                                                                                       | (M(1) <sub>a</sub> M(2) <sub>b</sub> M(3) <sub>c</sub> M(4) <sub>d</sub> ) <sub>8</sub> B <sub>2</sub><br>M = <i>d</i> -metals, Mg<br><i>a</i> , <i>b</i> , <i>c</i> , <i>d</i> = 0–5.53 |

|                         |                                                                                                         |        |    |                                                                       |                           |                                                                                                                                                   |
|-------------------------|---------------------------------------------------------------------------------------------------------|--------|----|-----------------------------------------------------------------------|---------------------------|---------------------------------------------------------------------------------------------------------------------------------------------------|
|                         |                                                                                                         | 22     |    |                                                                       |                           | M(1) <sub>2</sub> M(2)M(3) <sub>5</sub> B <sub>2</sub><br>M(1) = Mg, Sc, Ti, Nb;<br>M(2) = <i>d</i> -metals, Ge, Ga, Al, Be;<br>M(3) = Rh, Ir, Ru |
|                         |                                                                                                         | 7      |    |                                                                       |                           | M <sub>2</sub> Fe(Rh <sub>a</sub> Ru <sub>b</sub> ) <sub>5</sub> B <sub>2</sub><br>M = Ti, Sc <i>a, b</i> = 1–4                                   |
|                         |                                                                                                         | 6      |    |                                                                       |                           | M(1) <sub>3</sub> M(2) <sub>5</sub> B <sub>2</sub><br>M(1) = Sc, Ti, Hf, Nb, Ta;<br>M(2) = Ru, Co, Rh, Ir                                         |
| <b>fcu-11-<br/>Fdd2</b> | 32                                                                                                      | 29     | 15 | 0.67                                                                  | <i>Fddd</i>               | M(1)M(2) <sub>2</sub> B <sub>2</sub><br>M(1) = REM, Ca, Sr;<br>M(2) = Ru, Rh, Ir                                                                  |
|                         |                                                                                                         |        | 14 |                                                                       |                           | <i>F222</i>                                                                                                                                       |
|                         |                                                                                                         | 3      | 2  | 0.5                                                                   | <i>Fdd2</i>               | MiRb M = Cu, Pd                                                                                                                                   |
|                         |                                                                                                         |        | 1  |                                                                       |                           | <i>Fddd</i>                                                                                                                                       |
| <b>hcp</b>              | 26                                                                                                      | 12     | 5  | 0.33                                                                  | <i>Pnma</i>               | M(1) <sub>3-x</sub> M(2) <sub>x</sub> B<br>M = Fe, Co, Ni, Rh, Ir                                                                                 |
|                         |                                                                                                         |        | 4  |                                                                       |                           | M <sub>3</sub> B M = Fe, Co, Ni, Pd                                                                                                               |
|                         |                                                                                                         |        | 2  |                                                                       |                           | M(1)M(2) <sub>2</sub> B M = Fe, Co, Ni                                                                                                            |
|                         |                                                                                                         |        | 1  |                                                                       | <i>P2<sub>1</sub>/c</i>   | TaCo <sub>2</sub> B                                                                                                                               |
|                         |                                                                                                         | 7      |    | 0.08                                                                  | <i>P6<sub>3</sub>/mmc</i> | M(1) <sub>9</sub> M(2) <sub>4</sub> B<br>M(1) = Zr, Hf; M(2) = Mo, W, Re Os                                                                       |
|                         |                                                                                                         | 6      | 4  | 0.5                                                                   | <i>Pnma</i>               | M(1)M(2)B<br>M(1) = Re, Mo, W; M(2) = Fe, Co                                                                                                      |
|                         |                                                                                                         |        | 1  |                                                                       |                           | Rh <sub>2</sub> B                                                                                                                                 |
|                         |                                                                                                         |        | 1  |                                                                       | <i>P6<sub>3</sub>/mmc</i> | Pt <sub>2</sub> B                                                                                                                                 |
|                         |                                                                                                         | 1      |    | 1                                                                     | <i>P6<sub>3</sub>/mmc</i> | RhB                                                                                                                                               |
|                         |                                                                                                         | 11T618 | 23 | 20                                                                    | 0.46                      | <i>R-3m</i>                                                                                                                                       |
| 2                       | LaCo <sub>6</sub> Fe <sub>6</sub> B <sub>6</sub> ; YCo <sub>11.5</sub> Fe <sub>0.5</sub> B <sub>6</sub> |        |    |                                                                       |                           |                                                                                                                                                   |
| 1                       | <i>C2/m</i>                                                                                             |        |    | La <sub>0.85</sub> Ce <sub>0.15</sub> Fe <sub>12</sub> B <sub>6</sub> |                           |                                                                                                                                                   |
| <b>nce</b>              | 22                                                                                                      | 21     | 20 | 0.67                                                                  | <i>I4/mmm</i>             | M(1)M(2) <sub>2</sub> B <sub>2</sub><br>M(1) = REM, Ba;<br>M(2) = Fe, Co, Rh, Ir                                                                  |
|                         |                                                                                                         |        | 1  |                                                                       |                           | Co <sub>4</sub> GdYB <sub>4</sub>                                                                                                                 |
|                         |                                                                                                         | 1      |    | 0.68                                                                  |                           | Co <sub>1.92</sub> TbB <sub>2</sub>                                                                                                               |
| <b>hex</b>              | 15                                                                                                      | 9      |    | 0.125                                                                 | <i>P6<sub>3</sub>/mcm</i> | M(1) <sub>5</sub> M(2) <sub>3</sub> B<br>M(1) = REM, <i>d</i> -metals;<br>M(2) = Ge, Sn, Pb                                                       |
|                         |                                                                                                         | 2      |    | 0.5                                                                   | <i>P-62m</i>              | MFeB M = Nb, Ta                                                                                                                                   |
|                         |                                                                                                         | 2      |    | 0.18                                                                  | <i>P-62m</i>              | Sn <sub>5</sub> M <sub>6</sub> B <sub>2</sub> M = Rh, Ir                                                                                          |
|                         |                                                                                                         | 1      |    | 1                                                                     | <i>Cmcm</i>               | RhB                                                                                                                                               |

|                                    |    |    |        |            |                                                                                                                     |
|------------------------------------|----|----|--------|------------|---------------------------------------------------------------------------------------------------------------------|
|                                    |    | 1  | 0.1    | $P6_3/mmc$ | $\text{Sn}_4\text{Rh}_6\text{B}$                                                                                    |
| 10T1540                            | 15 | 10 | 0.43   | $P6_3mc$   | $(\text{M}(1)_a\text{M}(2)_b\text{M}(3)_c)_7\text{B}_3$<br>M = d-metals a, b, c = 0–6.6                             |
|                                    |    | 3  |        |            | $\text{M}_7\text{B}_3$ M = Tc, Ru, Rh                                                                               |
|                                    |    | 2  |        |            | $\text{MRh}_6\text{B}_3$ M = Fe, Co                                                                                 |
| 6,7T1515                           | 13 | 5  | 0.27   | $P4/mbm$   | $\text{M}_2\text{Ru}_{18}\text{Ti}_9\text{B}_8$ M = d-metals                                                        |
|                                    |    | 3  |        |            | $\text{Ti}_8\text{M}_3\text{Ru}_{18}\text{B}_8$ M = Cr, Mn, Ni                                                      |
|                                    |    | 3  |        |            | $(\text{M}(1)_a\text{M}(2)_b\text{M}(3)_c)_{29}\text{B}_8$<br>M = d-metals a, b, c = 0–18.95                        |
|                                    |    | 2  |        |            | $\text{Zn}_{10}\text{MRh}_{18}\text{B}_8$ M = Fe, Ni                                                                |
| <b>gra</b>                         | 11 |    | 0.2    | $P6_3/mmc$ | $\text{M}(1)_3\text{M}(2)_7\text{B}_2$<br>M(1) = Ln, Y, U; M(2) = Ni, Co                                            |
| 9,11 <sup>2</sup> ,12T2            | 8  |    | 0.46   | $Cmc2_1$   | $\text{MNi}_{12}\text{B}_6$ M = REM, Th                                                                             |
| 10T21                              | 7  |    | 0.33   | $P6_222$   | $\text{MPt}_2\text{B}$ M = REM                                                                                      |
| <b>bct</b>                         | 5  |    | 0.33   | $Cmcm$     | $\text{Re}_{3-x}\text{M}_x\text{B}$ M = V, Cr, W; $\text{Tc}_3\text{B}$                                             |
| <b>svg</b>                         | 4  |    | 0.57   | $Fmmm$     | $\text{M}_2\text{Rh}_5\text{B}_4$ M = Ca, Sr, La, Eu                                                                |
| 5,7T900                            | 4  |    | 0.54   | $Fmmm$     | $\text{M}(1)_3\text{M}(2)_8\text{B}_6$<br>M(1) = Ca, Sr, Y, Eu; M(2) = Rh, Os                                       |
| 7T30                               | 4  | 3  | 0.5    | $Fddd$     | $\text{MnRe}_3\text{B}_2$ ; $(\text{Mo}_{1.7}\text{Ge}_{0.3})\text{B}$ ; $(\text{Re}_{1.5}\text{Cr}_{0.5})\text{B}$ |
|                                    |    | 1  |        | $C222$     | $\text{Cr}_2\text{B}$                                                                                               |
| <b>kwh</b>                         | 4  |    | 0.2    | $R-3m$     | $\text{Ca}_3\text{Ni}_7\text{B}_2$ ; $\text{Eu}_3\text{Pt}_7\text{B}_2$ ; $(\text{Mg}_a\text{Ni}_b)_{10}\text{B}_2$ |
| <b>ecf</b>                         | 3  |    | 0.43   | $P6_3mc$   | $\text{Re}_{7-x}\text{M}_x\text{B}_3$ M = Cr, W; $\text{Re}_7\text{B}_3$                                            |
| <b>bcu-x-13-P4<sub>2</sub>/mnm</b> | 3  |    | 0.33   | $P4_2/n$   | $\text{M}_{3-x}\text{Re}_x\text{B}$ M = Fe, Co; $\text{Fe}_3\text{B}$                                               |
| 8 <sup>2</sup> T1742               | 3  |    | 0.33   | $I4_1/amd$ | $\text{Lu}_2\text{Pd}_{13.2}\text{B}_5$                                                                             |
|                                    |    |    | 0.32   |            | $\text{Yb}_2\text{Pd}_{13.6}\text{B}_5$                                                                             |
|                                    |    |    | 0.3125 |            | $\text{Y}_2\text{Pd}_{14}\text{B}_5$                                                                                |
| <b>lcy</b>                         | 3  | 2  | 0.2    | $P4_332$   | $\text{Li}_2\text{M}_3\text{B}$ M = Pt, Pd                                                                          |
|                                    |    | 1  |        | $P4_132$   | $(\text{Pt}_{0.67}\text{Cu}_{0.33})_3\text{Cu}_2\text{B}$                                                           |
| 8,12T1                             | 3  |    | 0.17   | $P6_3/mmc$ | $\text{Hf}_9\text{M}_3\text{B}_2$ M = Mo, W;<br>$(\text{Hf}_{0.5}\text{Zr}_{0.5})_9\text{Mo}_3\text{B}_2$           |
| <b>dia</b>                         | 3  | 2  | 0.083  | $Fd-3m$    | $\text{Mg}_8\text{M}_4\text{B}$ M = Pt, Rh                                                                          |
|                                    |    | 1  | 0.2    | $R-3m$     | $\text{Mg}_{3.58}\text{Ni}_{6.42}\text{B}_2$                                                                        |
| 11T99                              | 2  |    | 0.5    | $Fddd$     | $\text{Cr}_2\text{B}$ ; $(\text{Re}_{1.6}\text{V}_{0.4})\text{B}$                                                   |
| 10T22                              | 2  |    | 0.46   | $R-3m$     | $\text{La}_{0.85}\text{Ce}_{0.15}\text{Fe}_{12}\text{B}_6$ ; $\text{YCo}_{9.5}\text{Fe}_{2.5}\text{B}_6$            |
| 10,11,12 <sup>2</sup> T5           | 2  |    | 0.46   | $Cmc2_1$   | $\text{MNi}_{12}\text{B}_6$ M = Y, Pr                                                                               |
| 8,11T559                           | 2  |    | 0.43   | $P-62m$    | $\text{Ga}_{2.7}\text{Ir}_9\text{B}_5$                                                                              |
|                                    |    |    | 0.42   |            | $\text{Pt}_9\text{Cu}_3\text{B}_5$                                                                                  |
| <b>svi-x</b>                       | 2  |    | 0.33   | $I4/mcm$   | $\text{M}_5\text{GeB}_2$ M = Mo, Ta                                                                                 |
| 11T106                             | 2  |    | 0.33   | $I-4$      | $\text{Fe}_3\text{B}$ ; $\text{Fe}_2\text{NiB}$                                                                     |
| 4,5T428                            | 2  |    | 0.29   | $P6_3/mmc$ | $\text{M}_2\text{Co}_5\text{B}_2$ M = Ce, Nd                                                                        |
| 7,10T481                           | 2  |    | 0.25   | $Pmma$     | $\text{Zn}_5\text{M}_7\text{B}_3$ M = Rh, Ir                                                                        |
| <b>eca</b>                         | 2  |    | 0.2    | $Pnma$     | $\text{MPd}_4\text{B}$ M = Sr, Ba                                                                                   |
| 12T657                             | 1  |    | 3      | $P6_3/m$   | $\text{PrB}_3$                                                                                                      |

|                                   |   |        |                           |                                                                  |
|-----------------------------------|---|--------|---------------------------|------------------------------------------------------------------|
| <b>ecu</b>                        | 1 | 1      | <i>Cmcm</i>               | (Al <sub>0.1</sub> Mo <sub>0.9</sub> )B                          |
| 8,10T2478                         | 1 | 0.8    | <i>P6<sub>3</sub>/mmc</i> | Rh <sub>5</sub> B <sub>4</sub>                                   |
| 13T4                              | 1 | 0.8    | <i>I4<sub>1</sub>/a</i>   | Ir <sub>5</sub> B <sub>4</sub>                                   |
| 7,9,10T9                          | 1 | 0.6    | <i>Pmmm</i>               | ZnIr <sub>4</sub> B <sub>3</sub>                                 |
| 9,11T2521                         | 1 | 0.55   | <i>I-43m</i>              | Mg <sub>10</sub> Ir <sub>19</sub> B <sub>16</sub>                |
| 6,8T1564                          | 1 | 0.54   | <i>Fmmm</i>               | La <sub>3</sub> Ru <sub>8</sub> B <sub>6</sub>                   |
| 5 <sup>2</sup> ,7T7               | 1 | 0.53   | <i>Fmmm</i>               | Sr <sub>5</sub> Rh <sub>14</sub> B <sub>10</sub>                 |
| 5 <sup>3</sup> ,7T1               | 1 | 0.52   | <i>Fmmm</i>               | Ca <sub>7</sub> Rh <sub>20</sub> B <sub>14</sub>                 |
| 11,12,14T6                        | 1 | 0.5    | <i>Pmmn</i>               | TaCoB                                                            |
| 12T462                            | 1 | 0.46   | <i>R-3m</i>               | HoCo <sub>12</sub> B <sub>6</sub>                                |
| 12 <sup>2</sup> T2341             | 1 | 0.4375 | <i>Ia-3d</i>              | AlPd <sub>15</sub> B <sub>7</sub>                                |
| 10,12T2862                        | 1 | 0.43   | <i>P6<sub>3</sub>cm</i>   | Cu <sub>0.95</sub> Pd <sub>6.05</sub> B <sub>3</sub>             |
| 9,11 <sup>2</sup> T2              | 1 | 0.43   | <i>P4/mbm</i>             | Li <sub>2.8</sub> Ni <sub>16</sub> B <sub>8</sub>                |
| 10,12T2861                        | 1 | 0.43   | <i>Pnma</i>               | Cu <sub>0.50</sub> Pd <sub>6.51</sub> B <sub>3</sub>             |
| 7,8 <sup>2</sup> T14              | 1 | 0.42   | <i>Cmcm</i>               | Na <sub>3</sub> Pt <sub>9</sub> B <sub>5</sub>                   |
| <b>fcu-11-C2/c</b>                | 1 | 0.4    | <i>C2/c</i>               | Pd <sub>5</sub> B <sub>2</sub>                                   |
| 9,10T2661                         | 1 | 0.4    | <i>C2/c</i>               | La <sub>2</sub> Os <sub>2</sub> AlB <sub>2</sub>                 |
| 5 <sup>3</sup> ,6 <sup>3</sup> T3 | 1 | 0.39   | <i>Pbam</i>               | Li <sub>8</sub> Mg <sub>4</sub> Rh <sub>19</sub> B <sub>12</sub> |
| 6,8T1563                          | 1 | 0.33   | <i>P-62c</i>              | Ga <sub>3</sub> Pt <sub>9</sub> B <sub>4</sub>                   |
| 7 <sup>2</sup> T524               | 1 | 0.33   | <i>C2/m</i>               | YbPt <sub>5</sub> B <sub>2</sub>                                 |
| 5,7T489                           | 1 | 0.29   | <i>R-3m</i>               | Ce <sub>2</sub> Ir <sub>5</sub> B <sub>2</sub>                   |
| <b>hcp-10-P6<sub>3</sub>/m</b>    | 1 | 0.27   | <i>P6<sub>3</sub>/m</i>   | Sn <sub>4</sub> Ir <sub>7</sub> B <sub>3</sub>                   |
| <b>nin</b>                        | 1 | 0.25   | <i>P-62m</i>              | LiPt <sub>3</sub> B                                              |
| <b>tck-8,8-Pnma</b>               | 1 | 0.25   | <i>Cmcm</i>               | Zn <sub>2</sub> Ir <sub>2</sub> B                                |
| <b>crs</b>                        | 1 | 0.2    | <i>Fd-3m</i>              | Al <sub>2</sub> Re <sub>3</sub> B                                |
| 5,7T899                           | 1 | 0.2    | <i>P6<sub>3</sub>/mmc</i> | Ca <sub>5</sub> Ni <sub>15</sub> B <sub>4</sub>                  |
| 4,5 <sup>2</sup> T80              | 1 | 0.2    | <i>Imma</i>               | NdNi <sub>4</sub> B                                              |
| <b>tsi</b>                        | 1 | 0.2    | <i>C2/m</i>               | Ni <sub>3</sub> Zn <sub>2</sub> B                                |
| <b>tck-7,8-Pbcm</b>               | 1 | 0.1875 | <i>Pmma</i>               | Zn <sub>7.4</sub> Rh <sub>8.6</sub> B <sub>3</sub>               |

\*Hereafter REM = rare earth metals; AEM = alkaline earth metals

Table S2. Topological types of carbon substructures in inorganic carbides.

| Topological type | Occurrence |            |             | C/M ratio         | Space group               | Carbides                                                                                                                                           |
|------------------|------------|------------|-------------|-------------------|---------------------------|----------------------------------------------------------------------------------------------------------------------------------------------------|
| <b>fcu</b>       | 181        | 106        | 48          | 1                 | <i>Fm-3m</i>              | (M(1) <sub>a</sub> M(2) <sub>b</sub> M(3) <sub>c</sub> )C<br><i>a, b, c = 0–0.9</i><br>M = <i>d</i> -metals, Al, Ce, U, Pu                         |
|                  |            |            | 31          |                   |                           | M(1)M(2)C <sub>2</sub><br>M = <i>d</i> -metals, An, Ce                                                                                             |
|                  |            |            | 17          |                   |                           | MC M = <i>d</i> -metals, An, Ce                                                                                                                    |
|                  |            |            | 7           |                   |                           | M(1)M(2)M(3) <sub>2</sub> C <sub>4</sub><br>M(1), M(2) = <i>d</i> -metals, U;<br>M(3) = Zr, Ta, Nb, W                                              |
|                  |            |            | 2           |                   |                           | (Ta <sub>2</sub> V <sub>3</sub> Zr <sub>3</sub> C <sub>8</sub> ) <sub>0.5</sub> ; (Ta <sub>0.92</sub> U <sub>1.08</sub> )C <sub>2</sub>            |
|                  |            |            | 1           |                   | <i>Fd-3m</i><br>TiC       |                                                                                                                                                    |
|                  |            | 24         | 13          | 0.0625            | <i>P4<sub>2</sub>/mnm</i> | (M(1) <sub>a</sub> M(2) <sub>b</sub> M(3) <sub>c</sub> M(4) <sub>d</sub> ) <sub>16</sub> C<br><i>a, b, c, d = 0–14</i><br>M = <i>d</i> -metals, Ln |
|                  |            |            | 11          |                   |                           | M <sub>2</sub> Fe <sub>14</sub> C M = Ln, La                                                                                                       |
|                  |            | 21         | 8           | 0.5               | <i>P4<sub>2</sub>/mmc</i> | MCoC M = Ln, Y                                                                                                                                     |
|                  |            |            |             |                   | <i>R-3m</i>               | M <sub>2</sub> C M = REM<br>Y <sub>2-x</sub> Sc <sub>x</sub> C                                                                                     |
|                  |            |            |             |                   | <i>Pnnm</i>               | Ti <sub>0.11</sub> V <sub>0.89</sub> C <sub>0.5</sub> ; Mo <sub>1.5</sub> W <sub>0.5</sub> C; Fe <sub>2</sub> C                                    |
|                  |            |            |             |                   | <i>Fm-3m</i>              | Be <sub>2</sub> C                                                                                                                                  |
|                  |            |            |             |                   | <i>P2/m</i>               | Tb <sub>4</sub> Co <sub>2</sub> C <sub>3</sub>                                                                                                     |
|                  |            |            |             |                   | <i>C2/m</i>               | M(1) <sub>2</sub> M(2) <sub>2</sub> C <sub>3</sub><br>M(1) = Ln, Y, W, U;<br>M(2) = Cr, Mo, W, Re                                                  |
|                  |            | 18         | 17          | 0.75              | <i>Pnnm</i>               | Th <sub>2</sub> Al <sub>2</sub> C <sub>3</sub>                                                                                                     |
|                  |            |            | 1           |                   |                           |                                                                                                                                                    |
|                  |            | 6          |             | 0.034             | <i>Fm-3m</i>              | M <sub>6</sub> Mg <sub>23</sub> C M = Ln, La                                                                                                       |
|                  |            | 4          |             | 2                 | <i>Fm-3m</i>              | MC <sub>2</sub> M = Sr, Ba, Sc, U                                                                                                                  |
|                  |            | 1          |             | 1.23              | <i>Fm-3m</i>              | (Mo <sub>0.45</sub> W <sub>0.36</sub> )C                                                                                                           |
| 1                |            | 0.33       | <i>R-3c</i> | Ni <sub>3</sub> C |                           |                                                                                                                                                    |
| <b>pcu</b>       | 147        | 144        | 132         | 0.25              | <i>Pm-3m</i>              | M(1)M(2) <sub>3</sub> C<br>M(1) = <i>p</i> -, <i>d</i> -, <i>f</i> -metals, Mg, Ca;<br>M(2) = <i>d</i> -metals, Ln, Mg                             |
|                  |            |            | 5           |                   |                           | (M <sub>a</sub> Ga <sub>b</sub> )Mn <sub>3</sub> C<br>M = Al, In, Zn <i>a, b = 0.02–0.98</i>                                                       |
|                  |            |            | 2           |                   |                           | M(1) <sub>4-x</sub> M(2) <sub>x</sub> C<br>M = Mn, Cr, Sn, Pt                                                                                      |
|                  |            |            | 2           |                   | <i>P4/mmm</i>             | M(1)M(2) <sub>3</sub> C<br>M(1) = Ga, Sn; M(2) = Pt, Pd                                                                                            |
|                  |            |            | 1           |                   |                           | Mn <sub>2</sub> Co <sub>2</sub> C                                                                                                                  |
|                  |            |            | 1           |                   |                           | <i>I4/mcm</i><br>Mn <sub>3</sub> GeC                                                                                                               |
|                  |            |            | 1           |                   |                           | <i>P-43m</i><br>Fe <sub>4</sub> C                                                                                                                  |
|                  |            | 2          |             | 0.07              | <i>I4/mcm</i>             | (La <sub>a</sub> Fe <sub>b</sub> Ga <sub>c</sub> ) <sub>14</sub> C<br><i>a, b, c = 1–10.1</i>                                                      |
|                  |            | 1          |             | 1                 | <i>Pm-3m</i>              | LaC                                                                                                                                                |
|                  |            | <b>hex</b> | 96          | 54                | 37                        | 0.33                                                                                                                                               |

|            |      |              |                                  |                           |                                                      |                                                                                                                |
|------------|------|--------------|----------------------------------|---------------------------|------------------------------------------------------|----------------------------------------------------------------------------------------------------------------|
|            |      |              | 7                                |                           |                                                      | $(M(1)_aM(2)_bM(3)_c)_3C$<br>M = <i>p</i> -, <i>d</i> -metals<br>$a, b, c = 0.066-2$                           |
|            |      |              | 5                                |                           |                                                      | M(1)M(2)AlC<br>M = Ti, V, Cr, Nb, Ta                                                                           |
|            |      |              | 5                                |                           |                                                      | $(V_{1-x}Cr_x)_2GaC$                                                                                           |
|            |      | 19           |                                  | 0.125                     |                                                      | M(1) <sub>3</sub> M(2) <sub>5</sub> C<br>M(1) = Ge, Sn, Al, Sb, Pb;<br>M(2) = <i>d</i> -metals, Ln             |
|            |      | 12           | 7                                | 1                         | <i>P-6m2</i>                                         | $W_{1-x}M_xC$ M = Al, Mo                                                                                       |
|            |      |              | 5                                |                           |                                                      | MC                                                                                                             |
|            |      | 6            | 5                                | 0.5                       | <i>P-3m1</i><br><i>P6<sub>3</sub>/mmc</i>            | M <sub>2</sub> C M = <i>d</i> -metals                                                                          |
|            |      |              | 1                                |                           |                                                      | Mo <sub>2</sub> C                                                                                              |
|            |      | 3            | 2                                | 0.25                      | <i>Cmcm</i><br><i>P6<sub>3</sub>/mmc</i>             | M <sub>3</sub> GeC M = Cr, V                                                                                   |
|            |      |              | 1                                |                           |                                                      | Mo <sub>2</sub> Ga <sub>2</sub> C                                                                              |
|            |      | 1            |                                  | 0.63                      | <i>P6<sub>3</sub>/mmc</i>                            | $(TiV_{0.7}Cr_{0.05}NbTa)AlC_3$                                                                                |
|            |      | 1            |                                  | 0.2                       | <i>C222<sub>1</sub></i>                              | Mo <sub>4</sub> Ce <sub>4</sub> Al <sub>7</sub> C <sub>3</sub>                                                 |
| <b>crs</b> | 43   | 42           | 17                               | 0.167                     | <i>Fd-3m</i>                                         | M(1) <sub>3</sub> M(2) <sub>3</sub> C M = <i>d</i> -metals                                                     |
|            |      |              | 12                               |                           |                                                      | M(1) <sub>2</sub> M(2) <sub>4</sub> C M = <i>d</i> -metals                                                     |
|            |      |              | 8                                |                           |                                                      | M(1) <sub>3</sub> M(2) <sub>1.5</sub> M(3) <sub>1.5</sub> C<br>M(1) = Ta, Nb;<br>M(2), M(3) = <i>d</i> -metals |
|            |      |              | 3                                |                           |                                                      | M(1) <sub>2</sub> M(2) <sub>2</sub> Ti <sub>2</sub> C<br>M = Ta, Co, Nb, Ni                                    |
|            |      |              | 2                                |                           |                                                      | M(1)Al <sub>2</sub> M(2) <sub>3</sub> C<br>M(1) = Co, Ni; M(2) = Ti, Ta                                        |
|            |      | 1            | 0.5                              | Ti <sub>2</sub> C         |                                                      |                                                                                                                |
| <b>reo</b> | 35   | 18           | 13                               | 0.16                      | <i>R-3m</i>                                          | M(1) <sub>2</sub> M(2) <sub>17</sub> C <sub>3</sub><br>M(1) = Ln, Y; M(2) = Fe, Mn                             |
|            |      |              | 5                                |                           |                                                      | Sm <sub>2</sub> Fe <sub>17-x</sub> M <sub>x</sub> C <sub>3</sub><br>M = Co, Ga                                 |
|            |      | 16           | 13                               | 0.26                      | <i>Fm-3m</i>                                         | M(1) <sub>23-x</sub> M(2) <sub>x</sub> C <sub>6</sub><br>M = <i>d</i> -metals                                  |
|            |      |              | 2                                |                           |                                                      | M <sub>23</sub> C <sub>6</sub> M = Cr, Mn                                                                      |
|            |      |              | 1                                |                           |                                                      | Cr <sub>16</sub> Fe <sub>5</sub> Mo <sub>2</sub> C <sub>6</sub>                                                |
|            |      | 1            | 0.75                             | <i>Pm-3m</i>              | Nb <sub>4</sub> C <sub>3</sub>                       |                                                                                                                |
| <b>hcp</b> | 32   | 13           | 11                               | 0.75                      | <i>P6<sub>3</sub>/mmc</i><br><i>P6<sub>3</sub>mc</i> | MA <sub>3</sub> C <sub>3</sub> M = REM, U                                                                      |
|            |      |              | 2                                |                           |                                                      | MA <sub>3</sub> C <sub>3</sub> M = Sc, U                                                                       |
|            |      | 9            | 5                                | 0.33                      | <i>Pnma</i>                                          | Fe <sub>3-x</sub> M <sub>x</sub> C M = Mn, Fe                                                                  |
|            |      |              | 4                                |                           |                                                      | M <sub>3</sub> C M = Fe, Co, Mn, Cr                                                                            |
|            |      | 7            | 3                                | 0.5                       | <i>Pbcn</i>                                          | M(1) <sub>2-x</sub> M(2) <sub>x</sub> C<br>M = Cr, Mo, W, Mn                                                   |
|            |      |              | 2                                |                           |                                                      | M <sub>2</sub> C M = V, W                                                                                      |
|            |      |              | 1                                |                           |                                                      | VCrC                                                                                                           |
|            |      |              | 1                                |                           | <i>P6<sub>3</sub>/mmc</i>                            | Re <sub>2</sub> C                                                                                              |
|            |      | 1            | 1                                | <i>P6<sub>3</sub>/mmc</i> | Hf <sub>0.5</sub> Ta <sub>1.5</sub> C <sub>2</sub>   |                                                                                                                |
|            |      | 1            | 0.8                              | <i>P-3m1</i>              | $(Zr_{0.72}Y_{0.28})Al_4C_4$                         |                                                                                                                |
| 1          | 0.67 | <i>P-3m1</i> | Al <sub>2</sub> MgC <sub>2</sub> |                           |                                                      |                                                                                                                |
| 10,12T215  | 22   | 20           |                                  | 1                         | <i>Pnma</i>                                          | M(1)M(2)C <sub>2</sub>                                                                                         |

|                       |    |    |        |                                                                                           |                                                                                                                                                                        |                                                                                                                                     |
|-----------------------|----|----|--------|-------------------------------------------------------------------------------------------|------------------------------------------------------------------------------------------------------------------------------------------------------------------------|-------------------------------------------------------------------------------------------------------------------------------------|
|                       |    |    |        |                                                                                           | M(1) = REM, U, Pu;<br>M(2) = <i>d</i> -metals                                                                                                                          |                                                                                                                                     |
|                       |    | 2  | 0.67   | <i>Cmcm</i>                                                                               | Cr <sub>3</sub> C <sub>2</sub> ; Cr <sub>2</sub> VC <sub>2</sub>                                                                                                       |                                                                                                                                     |
| <b>tca</b>            | 14 | 12 | 8      | 0.5                                                                                       | <i>P6<sub>3</sub>/mmc</i>                                                                                                                                              | M(1) <sub>3</sub> M(2)C <sub>2</sub><br>M(1) = Ti, Zr, Ta;<br>M(2) = Al, Zn, Ge, Sn, In, Ga                                         |
|                       |    |    | 3      |                                                                                           |                                                                                                                                                                        | M <sub>3-x</sub> Ti <sub>x</sub> AlC <sub>2</sub> M = Ta, Cr, Zr                                                                    |
|                       |    |    | 1      |                                                                                           |                                                                                                                                                                        | Mo <sub>2</sub> TiAlC <sub>2</sub>                                                                                                  |
|                       |    | 1  | 0.53   | (Ta <sub>0.25</sub> Ti <sub>0.75</sub> ) <sub>3</sub> Al <sub>0.77</sub> C <sub>2</sub>   |                                                                                                                                                                        |                                                                                                                                     |
|                       |    | 1  | 0.52   | (Ta <sub>0.38</sub> Ti <sub>0.62</sub> ) <sub>3</sub> Al <sub>0.81</sub> C <sub>2</sub>   |                                                                                                                                                                        |                                                                                                                                     |
| <b>cab</b>            | 12 | 11 | 9      | 0.33                                                                                      | <i>Fm-3m</i>                                                                                                                                                           | M(1) <sub>21</sub> M(2) <sub>8</sub> M(3) <sub>7</sub> C <sub>12</sub><br>M(1) = La, Ce, Pr;<br>M(2) = Fe, Mn;<br>M(3) = Sn, Bi, Sb |
|                       |    |    | 2      |                                                                                           |                                                                                                                                                                        | La <sub>21</sub> M <sub>8</sub> Ge <sub>7-x</sub> Al <sub>x</sub> C <sub>12</sub><br>M = Fe, Mn                                     |
|                       |    | 1  | 0.34   | La <sub>21</sub> Cr <sub>7.55</sub> Al <sub>0.76</sub> Ge <sub>6.24</sub> C <sub>12</sub> |                                                                                                                                                                        |                                                                                                                                     |
| <b>bct</b>            | 12 | 10 | 0.0769 | <i>I4/mmm</i>                                                                             | MFe <sub>11</sub> TiC M = Ln, Y                                                                                                                                        |                                                                                                                                     |
|                       |    | 2  | 0.5    | <i>Pmnn</i>                                                                               | M <sub>2</sub> C M = Co, Rh                                                                                                                                            |                                                                                                                                     |
| 8 <sup>2</sup> T414   | 11 |    | 0.67   | <i>Pnma</i>                                                                               | Ln <sub>2</sub> ReC <sub>2</sub>                                                                                                                                       |                                                                                                                                     |
| <b>kag</b>            | 9  | 6  | 0.23   | <i>P6<sub>3</sub>/mmc</i>                                                                 | M(1) <sub>6</sub> Al <sub>3</sub> (Al <sub>2.5</sub> M(2) <sub>1.5</sub> )C <sub>3</sub><br>M(1) = Mo, W;<br>M(2) = Fe, Co, Ni, Mn                                     |                                                                                                                                     |
|                       |    | 3  |        |                                                                                           | Al <sub>11</sub> Cu <sub>3</sub> Mo <sub>12</sub> C <sub>6</sub> ; W <sub>9</sub> Al <sub>3</sub> CoC <sub>3</sub> ;<br>Ni <sub>10</sub> W <sub>3</sub> C <sub>3</sub> |                                                                                                                                     |
| 10,13T588             | 9  |    | 0.125  | <i>Cmca</i>                                                                               | M <sub>2</sub> Ni <sub>22</sub> C <sub>3</sub> M = Ln, La                                                                                                              |                                                                                                                                     |
| <b>dia</b>            | 9  | 6  | 5      | 0.083                                                                                     | <i>Fd-3m</i>                                                                                                                                                           | M(1) <sub>6</sub> M(2) <sub>6</sub> C<br>M = Fe, Co, Ni, Mo, W                                                                      |
|                       |    |    | 1      |                                                                                           | <i>Fd-3</i>                                                                                                                                                            | Fe <sub>6</sub> W <sub>6</sub> C                                                                                                    |
|                       |    | 2  | 1      | 0.25                                                                                      | <i>Fd-3</i>                                                                                                                                                            | Fe <sub>2</sub> W <sub>2</sub> C                                                                                                    |
|                       |    |    | 1      |                                                                                           | <i>Fd-3m</i>                                                                                                                                                           | Nb <sub>8</sub> Zn <sub>4</sub> C <sub>3</sub>                                                                                      |
|                       |    | 1  | 0.09   | <i>Fd-3m</i>                                                                              | Ni <sub>5</sub> W <sub>6</sub> C                                                                                                                                       |                                                                                                                                     |
| 13T1310               | 8  |    | 0.084  | <i>Im-3m</i>                                                                              | M <sub>11</sub> Ni <sub>60</sub> C <sub>6</sub> M = Ln, Y                                                                                                              |                                                                                                                                     |
| <b>nce</b>            | 6  | 5  | 0.67   | <i>I4/mmm</i>                                                                             | MU <sub>2</sub> C <sub>2</sub><br>M = Ir, Pt, Rh, Ru, Os                                                                                                               |                                                                                                                                     |
|                       |    | 1  | 0.68   |                                                                                           | Th <sub>2</sub> Ni <sub>0.96</sub> C <sub>2</sub>                                                                                                                      |                                                                                                                                     |
| <b>lcy</b>            | 6  | 5  | 0.2    | <i>P4<sub>1</sub>32</i>                                                                   | M(1) <sub>2</sub> M(2) <sub>3</sub> C<br>M(1) = Al, Re;<br>M(2) = Mo, W, Nb, Ta                                                                                        |                                                                                                                                     |
|                       |    | 1  |        |                                                                                           | Mo <sub>3</sub> ReRuC                                                                                                                                                  |                                                                                                                                     |
| 12,13T503             | 5  |    | 0.67   | <i>P4<sub>2</sub>/mnm</i>                                                                 | M(1) <sub>2</sub> M(2)C <sub>2</sub><br>M(1) = Pr, Nd, Ce;<br>M(2) = Mo, W                                                                                             |                                                                                                                                     |
| 10,12T2852            | 4  | 3  | 0.6    | <i>P6<sub>3</sub>/mmc</i>                                                                 | M(1) <sub>4</sub> M(2)C <sub>3</sub><br>M(1) = V, Nb, Ti;<br>M(2) = Al, Ga                                                                                             |                                                                                                                                     |
|                       |    | 1  | 1      |                                                                                           | MoC                                                                                                                                                                    |                                                                                                                                     |
| 10 <sup>2</sup> T1533 | 4  |    | 0.75   | <i>C2/m</i>                                                                               | M <sub>2</sub> Mo <sub>2</sub> C <sub>3</sub> M = Ln                                                                                                                   |                                                                                                                                     |
| 10,12T2861            | 4  | 3  | 0.43   | <i>Pnma</i>                                                                               | M <sub>7</sub> C <sub>3</sub> M = Mn, Fe, Cr                                                                                                                           |                                                                                                                                     |

|                                        |   |   |       |                           |                                                                                                                                                 |
|----------------------------------------|---|---|-------|---------------------------|-------------------------------------------------------------------------------------------------------------------------------------------------|
|                                        |   | 1 |       |                           | Mn <sub>4</sub> Fe <sub>3</sub> C <sub>3</sub>                                                                                                  |
| <b>fcu</b>                             | 4 | 2 | 0.4   | <i>C2/c</i>               | M <sub>5</sub> C <sub>2</sub> M = Fe, Mn                                                                                                        |
|                                        |   | 2 |       |                           | Mn <sub>5-x</sub> Fe <sub>x</sub> C <sub>2</sub>                                                                                                |
| <b>tcl</b>                             | 3 | 1 | 0.75  | <i>R3mr</i>               | Al <sub>4</sub> C <sub>3</sub>                                                                                                                  |
|                                        |   | 1 |       | <i>R-3mr</i>              |                                                                                                                                                 |
|                                        |   | 1 |       | <i>R-3m</i>               |                                                                                                                                                 |
| 6,8T1565                               | 3 | 2 | 0.31  | <i>P6<sub>3</sub>/mmc</i> | W <sub>13-x</sub> M <sub>x</sub> C <sub>4</sub> M = Co, Ni                                                                                      |
|                                        |   | 1 | 0.33  |                           | Co <sub>3</sub> W <sub>9</sub> C <sub>4</sub>                                                                                                   |
| <b>tcj</b>                             | 2 |   | 1     | <i>P6<sub>3</sub>/mmc</i> | MC M = Mo, Re                                                                                                                                   |
| <b>bcu-x</b>                           | 2 | 1 | 1     | <i>I-42d</i>              | FeUC <sub>2</sub>                                                                                                                               |
|                                        |   | 1 | 0.045 | <i>Im-3m</i>              | U <sub>6</sub> Co <sub>12</sub> Ge <sub>4</sub> C                                                                                               |
| 12 <sup>3</sup> T5                     | 2 |   | 0.857 | <i>R3m</i>                | (ZrC) <sub>3</sub> Al <sub>3</sub> (Al <sub>0.958</sub> Ge <sub>0.042</sub> )C <sub>3</sub> ;<br>Zr <sub>3</sub> Al <sub>4</sub> C <sub>6</sub> |
| 10-layered<br>packing/<br>chhhchhhc    | 2 | 1 | 0.835 | <i>P6<sub>3</sub>/mmc</i> | HfAlC <sub>1.67</sub>                                                                                                                           |
|                                        |   | 1 | 0.83  | <i>P6<sub>3</sub>mc</i>   | Zr <sub>3</sub> Al <sub>3</sub> C <sub>5</sub>                                                                                                  |
| 9 <sup>2</sup> ,10 <sup>3</sup> T1     | 2 | 1 | 0.83  | <i>P3<sub>1</sub>12</i>   | V <sub>6</sub> C <sub>5</sub>                                                                                                                   |
|                                        |   | 1 |       | <i>P3<sub>1</sub></i>     |                                                                                                                                                 |
| 12 <sup>3</sup> T8                     | 2 |   | 0.83  | <i>R3m</i>                | (ZrC) <sub>2</sub> Al <sub>3</sub> (Al <sub>0.93</sub> Ge <sub>0.07</sub> )C <sub>3</sub> ;<br>Zr <sub>2</sub> Al <sub>4</sub> C <sub>5</sub>   |
| 8-layered<br>packing/<br>chhhchhh      | 2 |   | 0.8   | <i>P6<sub>3</sub>mc</i>   | M <sub>2</sub> Al <sub>3</sub> C <sub>4</sub> M = U, Zr                                                                                         |
| 9,11T300                               | 2 |   | 0.67  | <i>Pnma</i>               | Cr <sub>3</sub> C <sub>2</sub> ; (Cr <sub>2.55</sub> W <sub>0.45</sub> )C <sub>2</sub>                                                          |
| 10,12T2856                             | 1 |   | 1     | <i>P-6m2</i>              | CrC                                                                                                                                             |
| 8,10,11T5                              | 1 |   | 1     | <i>P4/mbm</i>             | U <sub>5</sub> Re <sub>3</sub> C <sub>8</sub>                                                                                                   |
| 9,10,11T11                             | 1 |   | 0.875 | <i>P4<sub>3</sub>32</i>   | V <sub>8</sub> C <sub>7</sub>                                                                                                                   |
| 9,10 <sup>2</sup> T7                   | 1 |   | 0.83  | <i>C2/m</i>               | Nb <sub>6</sub> C <sub>5</sub>                                                                                                                  |
| 6,7T1516                               | 1 |   | 0.8   | <i>P4/m</i>               | UW <sub>4</sub> C <sub>4</sub>                                                                                                                  |
| 11T106                                 | 1 |   | 0.8   | <i>I4/m</i>               | ThAl <sub>4</sub> C <sub>4</sub>                                                                                                                |
| <b>tce</b>                             | 1 |   | 0.8   | <i>I4/m</i>               | UCr <sub>4</sub> C <sub>4</sub>                                                                                                                 |
| 9,10 <sup>2</sup> T8                   | 1 |   | 0.75  | <i>P2<sub>1</sub>/c</i>   | Pr <sub>2</sub> Mo <sub>2</sub> C <sub>3</sub>                                                                                                  |
| <b>thp-x</b>                           | 1 |   | 0.75  | <i>I-43d</i>              | Sc <sub>4</sub> C <sub>3</sub>                                                                                                                  |
| 10 <sup>2</sup> T3                     | 1 |   | 0.67  | <i>Pnma</i>               | Y <sub>2</sub> ReC <sub>2</sub>                                                                                                                 |
| 6,10,12T7                              | 1 |   | 0.625 | <i>R-3m</i>               | Ti <sub>8</sub> C <sub>5</sub>                                                                                                                  |
| 8,9 <sup>2</sup> T12                   | 1 |   | 0.625 | <i>R3m</i>                | Ti <sub>8</sub> C <sub>5</sub>                                                                                                                  |
| 11,12 <sup>3</sup> ,13 <sup>3</sup> T1 | 1 |   | 0.56  | <i>P3<sub>1</sub>21</i>   | Fe <sub>10</sub> Gd <sub>13</sub> C <sub>13</sub>                                                                                               |
| 8,9T1103                               | 1 |   | 0.5   | <i>P4/mbm</i>             | Y <sub>5</sub> Al <sub>3</sub> C <sub>4</sub>                                                                                                   |
| <b>cco</b>                             | 1 |   | 0.5   | <i>Pbcn</i>               | Mo <sub>2</sub> C                                                                                                                               |
| <b>chb</b>                             | 1 |   | 0.5   | <i>Pna2<sub>1</sub></i>   | Nb <sub>2</sub> C                                                                                                                               |
| <b>ecf</b>                             | 1 |   | 0.43  | <i>P6<sub>3</sub>mc</i>   | Fe <sub>7</sub> C <sub>3</sub>                                                                                                                  |
| 10 <sup>2</sup> ,12T9                  | 1 |   | 0.43  | <i>P6<sub>3</sub>mc</i>   | Cr <sub>7</sub> C <sub>3</sub>                                                                                                                  |
| 10 <sup>2</sup> ,12T10                 | 1 |   | 0.43  | <i>Pbca</i>               | Fe <sub>7</sub> C <sub>3</sub>                                                                                                                  |
| <b>tcl</b>                             | 1 |   | 0.43  | <i>P3</i>                 | Ti <sub>5</sub> Al <sub>2</sub> C <sub>3</sub>                                                                                                  |
| 11 <sup>3</sup> ,12T2                  | 1 |   | 0.4   | <i>P-1</i>                | Fe <sub>5</sub> C <sub>2</sub>                                                                                                                  |
| 14T2                                   | 1 |   | 0.33  | <i>P6<sub>3</sub>22</i>   | Fe <sub>3</sub> C                                                                                                                               |
| 8,12T394                               | 1 |   | 0.29  | <i>C2/m</i>               | Mo <sub>12</sub> Fe <sub>22</sub> C <sub>10</sub>                                                                                               |

|            |   |      |                         |                                                                    |
|------------|---|------|-------------------------|--------------------------------------------------------------------|
| 6,7T1517   | 1 | 0.21 | <i>Pbcm</i>             | $\text{Nd}_8\text{Co}_{3.35}\text{Al}_{0.65}\text{Ge}_2\text{C}_3$ |
| <b>hxl</b> | 1 | 0.2  | <i>P-1</i>              | $\text{Mo}_4\text{Ce}_4\text{Al}_7\text{C}_3$                      |
| <b>eca</b> | 1 | 0.04 | <i>P6<sub>3</sub>mc</i> | $\text{Nd}_{15}\text{Ge}_9\text{C}$                                |

Table S3. Topological types of nitrogen substructures in inorganic nitrides.

| Topological type | Occurrence |     | N/M ratio | Space group  | Nitrides                                                                |                           |                                                                                                               |                                                      |
|------------------|------------|-----|-----------|--------------|-------------------------------------------------------------------------|---------------------------|---------------------------------------------------------------------------------------------------------------|------------------------------------------------------|
| fcu              | 224        | 118 | 1         | <i>Fm-3m</i> | M(1)M(2)N <sub>2</sub><br>M = <i>d</i> -metals, Ln, An, Al, Mg, Sr      |                           |                                                                                                               |                                                      |
|                  |            |     |           |              | MN M = <i>d</i> -metals, Ln, An, Al, Ga, In                             |                           |                                                                                                               |                                                      |
|                  |            |     |           |              | M(1) <sub>1-x</sub> M(2) <sub>x</sub> N<br>M = <i>d</i> -metals, Ln, An |                           |                                                                                                               |                                                      |
|                  |            |     |           |              | (Ta <sub>4-x</sub> M <sub>x</sub> )N <sub>4</sub> M = Li, Mg            |                           |                                                                                                               |                                                      |
|                  |            |     |           |              | M(1) <sub>2-x</sub> M(2) <sub>x</sub> N <sub>2</sub> M = Ln, An, Mg, Sn |                           |                                                                                                               |                                                      |
|                  |            | 6   |           | 5            | 1                                                                       | <i>R-3m</i>               | M(1)M(2)N <sub>2</sub><br>M(1) = Na, Sr; M(2) = <i>d</i> -metals, Ce                                          |                                                      |
|                  |            |     |           |              |                                                                         |                           | UN                                                                                                            |                                                      |
|                  |            | 2   |           |              |                                                                         | <i>F-43m</i>              | MN M = Fe, Co                                                                                                 |                                                      |
|                  |            | 2   |           |              |                                                                         | <i>Pmmn</i>               | CrN; (Cr <sub>0.95</sub> Ti <sub>0.05</sub> )N                                                                |                                                      |
|                  |            | 2   |           |              |                                                                         | <i>Pnmm</i>               | Cr <sub>1-x</sub> V <sub>x</sub> N                                                                            |                                                      |
|                  |            | 1   |           |              |                                                                         | <i>Pn-3m</i>              | WN                                                                                                            |                                                      |
|                  |            | 1   |           |              |                                                                         | <i>I4/mmm</i>             | MnN                                                                                                           |                                                      |
|                  |            | 1   |           |              |                                                                         | <i>C2/m</i>               | Li <sub>2</sub> Ta <sub>3</sub> N <sub>5</sub>                                                                |                                                      |
|                  |            | 8   |           | 6            | 2                                                                       | <i>Pnma</i>               | M(1)M(2)N M = AEM, <i>d</i> -metals, Li                                                                       |                                                      |
|                  |            |     |           |              |                                                                         |                           | SrLi <sub>1-x</sub> Cu <sub>x</sub> N                                                                         |                                                      |
|                  |            | 6   |           | 3            | 2                                                                       | <i>Ia-3</i>               | Li <sub>3</sub> MN <sub>2</sub> M = Al, Ga, Sc                                                                |                                                      |
|                  |            |     |           |              |                                                                         |                           | Li <sub>53.33</sub> M <sub>10.67</sub> N <sub>32</sub> M = Ti, Ge                                             |                                                      |
|                  |            |     |           |              |                                                                         |                           | Li <sub>3.33</sub> Ge <sub>0.67</sub> N <sub>2</sub>                                                          |                                                      |
|                  |            | 5   |           | 4            | 1                                                                       | <i>R-3m</i>               | M <sub>2</sub> N M = Ca, Sr, Ba                                                                               |                                                      |
|                  |            |     |           |              |                                                                         |                           | Ba <sub>1.04</sub> Sr <sub>0.96</sub> N                                                                       |                                                      |
|                  |            | 4   |           | 2            | 2                                                                       | <i>P4<sub>2</sub>/mnm</i> | Ca <sub>2</sub> Li <sub>2-x</sub> Cu <sub>x</sub> N <sub>2</sub>                                              |                                                      |
|                  |            |     |           |              |                                                                         |                           | Ca <sub>2</sub> Li(Li <sub>0.18</sub> Fe <sub>0.82</sub> )N <sub>2</sub> ; Sr <sub>2</sub> LiCoN <sub>2</sub> |                                                      |
|                  |            | 3   |           |              |                                                                         | <i>Pa-3</i>               | Li <sub>7</sub> MN <sub>4</sub> M = V, Nb, Ta                                                                 |                                                      |
|                  |            | 3   |           |              |                                                                         | <i>P4/nmm</i>             | M(1)M(2)N M = <i>d</i> -metals, Ca, Ga                                                                        |                                                      |
|                  |            | 3   |           |              |                                                                         | <i>P-3m1</i>              | M <sub>0.5</sub> N M = Ce, Nd, Pr                                                                             |                                                      |
|                  |            | 3   |           | 2            | 1                                                                       | <i>P4<sub>2</sub>/mmc</i> | M(1)M(2)N M = Li, Ca, Sr, Ni                                                                                  |                                                      |
|                  |            |     |           |              |                                                                         |                           | CaNi <sub>0.42</sub> Li <sub>0.58</sub> N                                                                     |                                                      |
|                  |            | 2   |           |              |                                                                         | <i>P-43n</i>              | Li <sub>7</sub> MN <sub>4</sub> M = V, Mn                                                                     |                                                      |
|                  |            | 2   |           |              |                                                                         | <i>R-3mr</i>              | M <sub>2</sub> N M = Ca, Sr                                                                                   |                                                      |
|                  |            | 2   |           |              |                                                                         | <i>Pmnn</i>               | M <sub>2</sub> N M = Co, Pd                                                                                   |                                                      |
|                  |            | 2   |           |              |                                                                         | <i>Fm-3m</i>              | LiMgN; (Li <sub>7.2</sub> Cr <sub>0.8</sub> )N <sub>4</sub>                                                   |                                                      |
|                  |            | 2   |           |              |                                                                         | <i>P4bm</i>               | NbCrN; Ta <sub>0.8</sub> Cr <sub>1.2</sub> N                                                                  |                                                      |
|                  |            | 1   |           |              |                                                                         | <i>F-43m</i>              | LiZnN                                                                                                         |                                                      |
|                  |            | 1   |           |              |                                                                         | <i>P4<sub>2</sub>/nmc</i> | Li <sub>7</sub> VN <sub>4</sub>                                                                               |                                                      |
|                  |            | 1   |           |              |                                                                         | <i>Ibam</i>               | Li <sub>3</sub> FeN <sub>2</sub>                                                                              |                                                      |
|                  |            | 1   |           |              |                                                                         | <i>Pbcm</i>               | CuSr <sub>0.53</sub> Ba <sub>0.47</sub> N                                                                     |                                                      |
|                  |            | 1   |           |              |                                                                         | <i>P2<sub>1</sub>/c</i>   | LiBeN                                                                                                         |                                                      |
|                  |            | 1   |           |              |                                                                         | <i>C2/c</i>               | BaCuN                                                                                                         |                                                      |
|                  |            | 6   |           | 5            | 1                                                                       | 0.67                      | <i>Ia-3</i>                                                                                                   | M <sub>3</sub> N <sub>2</sub> M = Be, Mg, Ca, Zn, Cd |
|                  |            |     |           |              |                                                                         |                           | <i>Pmmn</i>                                                                                                   | Li <sub>5</sub> ReN <sub>4</sub>                     |
|                  |            | 5   |           | 2            | 1                                                                       | 1.33                      | <i>Fd-3m</i>                                                                                                  | M <sub>3</sub> N <sub>4</sub> M = Ge, Sn             |
|                  |            |     |           |              |                                                                         |                           | <i>Pm-3m</i>                                                                                                  | W <sub>3</sub> N <sub>4</sub>                        |
|                  |            |     |           |              |                                                                         |                           | <i>R-3m</i>                                                                                                   | Th <sub>3</sub> N <sub>4</sub>                       |
|                  |            |     |           |              |                                                                         |                           | <i>R-3mr</i>                                                                                                  | Th <sub>3</sub> N <sub>4</sub>                       |

|     |        |              |                                                      |                           |                                                                       |                                                                                                                                      |
|-----|--------|--------------|------------------------------------------------------|---------------------------|-----------------------------------------------------------------------|--------------------------------------------------------------------------------------------------------------------------------------|
|     |        | 4            | 0.33                                                 | <i>P4/nmm</i>             | BiM <sub>2</sub> N M = La, Ce, Pr, Nd                                 |                                                                                                                                      |
|     |        | 3            | 0.17                                                 | <i>I4/mmm</i>             | Ca <sub>4-x</sub> M <sub>x</sub> Bi <sub>2</sub> N M = La, Pr         |                                                                                                                                      |
|     |        | 3            | 0.09                                                 | <i>R-3c</i>               | M(1) <sub>5</sub> M(2) <sub>6</sub> N<br>M(1) = In, Ga; M(2) = Sr, Ba |                                                                                                                                      |
|     |        | 2            | 1.5                                                  | <i>P-3m1</i>              | M <sub>2</sub> N <sub>3</sub> M = Th, U                               |                                                                                                                                      |
|     |        | 2            | 1.33                                                 | <i>Fd-3m</i>              | MgSb <sub>2</sub> N <sub>4</sub> ; MnTa <sub>2</sub> N <sub>4</sub>   |                                                                                                                                      |
|     |        | 2            | 1.25                                                 | <i>I4/m</i>               | M <sub>4</sub> N <sub>5</sub> M = Nb, Ta                              |                                                                                                                                      |
|     |        | 2            | 0.57                                                 | <i>P4<sub>2</sub>/nmc</i> | Li <sub>6</sub> MN <sub>4</sub> M = Mo, W                             |                                                                                                                                      |
|     |        | 2            | 0.25                                                 | <i>P2<sub>1</sub>/m</i>   | M <sub>2</sub> GeGaN M = Sr, Ba                                       |                                                                                                                                      |
|     |        | 1            | 1.32                                                 | <i>Fm-3m</i>              | Ti <sub>0.76</sub> N                                                  |                                                                                                                                      |
|     |        | 1            | 1.2                                                  | <i>Fm-3m</i>              | Ta <sub>0.83</sub> N                                                  |                                                                                                                                      |
|     |        | 1            | 1.14                                                 | <i>Fm-3m</i>              | ((Zr <sub>3</sub> Sc <sub>4</sub> )N <sub>8</sub> ) <sub>0.5</sub>    |                                                                                                                                      |
|     |        | 1            | 0.85                                                 | <i>R-3m</i>               | W <sub>7.08</sub> N <sub>6</sub>                                      |                                                                                                                                      |
|     |        | 1            | 0.6                                                  | <i>Ibca</i>               | Li <sub>4</sub> TaN <sub>3</sub>                                      |                                                                                                                                      |
|     |        | 1            | 0.53                                                 | <i>P4/ncc</i>             | Li <sub>15</sub> Cr <sub>2</sub> N <sub>9</sub>                       |                                                                                                                                      |
|     |        | 1            | 0.52                                                 | <i>Ibam</i>               | Li <sub>3</sub> Fe <sub>0.86</sub> N <sub>2</sub>                     |                                                                                                                                      |
| 1   | 0.036  | <i>Fm-3m</i> | Li <sub>16</sub> Sr <sub>6</sub> Ge <sub>6</sub> N   |                           |                                                                       |                                                                                                                                      |
| 1   | 0.0082 | <i>F-43m</i> | Li <sub>26</sub> Na <sub>58</sub> Ba <sub>38</sub> N |                           |                                                                       |                                                                                                                                      |
| pcu | 115    | 93           | 61                                                   | 0.25                      | <i>Pm-3m</i>                                                          | M(1)M(2) <sub>3</sub> N<br>M(1) = <i>p</i> -, <i>d</i> -metals;<br>M(2) = <i>d</i> -metals, Ln, AEM                                  |
|     |        |              | 28                                                   |                           |                                                                       | M(1) <sub>1-x</sub> M(2) <sub>x</sub> M(3) <sub>3</sub> N<br>M(1), M(2) = <i>p</i> -, <i>d</i> -metals, Gd;<br>M(3) = Ti, Fe, Mn, Cr |
|     |        |              | 2                                                    |                           |                                                                       | M <sub>4</sub> N M = Mn, Fe                                                                                                          |
|     |        |              | 2                                                    |                           |                                                                       | In <sub>0.4</sub> Mn <sub>3.6</sub> N; Cu <sub>3</sub> Pd <sub>0.989</sub> N                                                         |
|     |        | 3            |                                                      | <i>I4/mcm</i>             | Cr <sub>3-x</sub> Mn <sub>x</sub> GeN                                 |                                                                                                                                      |
|     |        | 1            |                                                      | <i>P-42<sub>1</sub>m</i>  | Cr <sub>3</sub> GeN                                                   |                                                                                                                                      |
|     |        | 4            |                                                      | 0.67                      | <i>I4/mmm</i>                                                         | M(1)M(2) <sub>2</sub> N <sub>2</sub><br>M(1) = Sb, Bi; M(2) = U, Th                                                                  |
|     |        | 3            | 2                                                    | 2                         | <i>Fm-3m</i>                                                          | MN <sub>2</sub> M = U, Np                                                                                                            |
|     |        |              | 1                                                    |                           | <i>R-3m</i>                                                           | WN <sub>2</sub>                                                                                                                      |
|     |        | 3            |                                                      | 0.33                      | <i>Pm-3m</i>                                                          | M <sub>3</sub> N M = Cu, Na; Cu <sub>3</sub> Pd <sub>0.02</sub> N                                                                    |
|     |        | 3            | 2                                                    | 1                         | <i>P4/nmm</i>                                                         | MN M = La, Pr                                                                                                                        |
|     |        |              | 1                                                    |                           | <i>P4/mmm</i>                                                         | LaReN <sub>2</sub>                                                                                                                   |
|     |        | 1            |                                                      | 0.5                       | <i>P4/mmm</i>                                                         | FeNiN                                                                                                                                |
|     |        | 1            |                                                      | 0.4                       | <i>Pm-3m</i>                                                          | Co <sub>2.5</sub> N                                                                                                                  |
|     |        | 1            |                                                      | 0.34                      | <i>Pm-3m</i>                                                          | (Li <sub>0.08</sub> Cu <sub>0.02</sub> )(Li <sub>0.02</sub> Cu <sub>2.79</sub> )N                                                    |
|     |        | 1            |                                                      | 0.28                      | <i>Fm-3m</i>                                                          | Cu <sub>3</sub> Au <sub>0.6</sub> N                                                                                                  |
|     |        | 1            |                                                      | 0.2                       | <i>Pmna</i>                                                           | Sr <sub>7</sub> Sn <sub>3</sub> N <sub>2</sub>                                                                                       |
| hex | 70     | 20           | 11                                                   | 0.33                      | <i>P6/mmm</i>                                                         | Li <sub>2</sub> (Li <sub>1-x</sub> M <sub>x</sub> )N M = <i>d</i> -metals                                                            |
|     |        |              | 7                                                    |                           |                                                                       | Li <sub>3-x</sub> M <sub>x</sub> N M = Cu, Co, Ni                                                                                    |
|     |        |              | 2                                                    |                           |                                                                       | M <sub>3</sub> N M = Li, Na                                                                                                          |
|     |        | 6            |                                                      |                           | <i>P6<sub>3</sub>/mmc</i>                                             | M(1)M(2) <sub>2</sub> N<br>M(1) = Al, Ga, In, Zn;<br>M(2) = Ti, Cr, Zn                                                               |
|     |        | 2            |                                                      |                           | <i>P6<sub>3</sub>/mcm</i>                                             | M <sub>3</sub> N M = K, Ba                                                                                                           |
|     |        | 1            |                                                      |                           | <i>P-6m2</i>                                                          | Re <sub>3</sub> N                                                                                                                    |
|     |        | 8            | 5                                                    |                           | 1                                                                     | <i>P-6m2</i>                                                                                                                         |

|     |    |       |                           |                                                                      |                           |                                                                                                                                         |                                                                                     |
|-----|----|-------|---------------------------|----------------------------------------------------------------------|---------------------------|-----------------------------------------------------------------------------------------------------------------------------------------|-------------------------------------------------------------------------------------|
|     |    |       | 3                         |                                                                      |                           | MN M = Nb, Ta, W                                                                                                                        |                                                                                     |
|     |    | 2     |                           |                                                                      | <i>P6<sub>3</sub>/mmc</i> | MN M = Nb, Ta                                                                                                                           |                                                                                     |
|     |    | 1     |                           |                                                                      | <i>P-62m</i>              | TaN                                                                                                                                     |                                                                                     |
|     |    | 1     |                           |                                                                      | <i>P-6</i>                | TaN                                                                                                                                     |                                                                                     |
|     |    | 10    | 6                         | 0.25                                                                 | <i>Cmcm</i>               | M(1)M(2) <sub>3</sub> N<br>M(1) = Al, Ga, Ge; M(2) = <i>d</i> -metals                                                                   |                                                                                     |
|     |    |       | 4                         |                                                                      | <i>P6<sub>3</sub>/mmc</i> | MBa <sub>3</sub> N M = Li, Na, Sb, Bi                                                                                                   |                                                                                     |
|     |    | 5     |                           | 0.33–<br>0.47                                                        | <i>P6/mmm</i>             | (Li <sub>1-x</sub> M <sub>x</sub> )Li <sub>1.14–1.98</sub> N M = Cu, Ni                                                                 |                                                                                     |
|     |    | 4     | 3                         | 0.375                                                                | <i>P-62m</i>              | Li <sub>5</sub> (M <sub>1-x</sub> Li <sub>x</sub> ) <sub>3</sub> N <sub>3</sub> M = Ni, Mn                                              |                                                                                     |
|     |    |       | 1                         |                                                                      |                           | Li <sub>5</sub> Ni <sub>3</sub> N <sub>3</sub>                                                                                          |                                                                                     |
|     |    | 4     | 2                         | 0.4                                                                  | <i>Cmca</i>               | Ba <sub>2</sub> Ni <sub>3</sub> N <sub>2</sub> ; Ba <sub>2</sub> (Ni <sub>0.57</sub> Li <sub>0.43</sub> )Ni <sub>2</sub> N <sub>2</sub> |                                                                                     |
|     |    |       | 1                         |                                                                      | <i>P6/mmm</i>             | Li <sub>1.99</sub> Co <sub>0.53</sub> N                                                                                                 |                                                                                     |
|     |    |       | 1                         |                                                                      | <i>Immm</i>               | Li <sub>4</sub> FeN <sub>2</sub>                                                                                                        |                                                                                     |
|     |    | 2     | 1                         | 0.5                                                                  | <i>P-3m1</i>              | TaN <sub>0.5</sub>                                                                                                                      |                                                                                     |
|     |    |       | 1                         |                                                                      | <i>P-6m2</i>              | LiNiN                                                                                                                                   |                                                                                     |
|     |    | 2     |                           | 0.34                                                                 | <i>P6/mmm</i>             | Li <sub>2.94</sub> N; Li <sub>2.92</sub> N                                                                                              |                                                                                     |
| 2   |    | 0.125 | <i>P6<sub>3</sub>/mcm</i> | Al <sub>3</sub> Hf <sub>5</sub> N; Sn <sub>3</sub> Zr <sub>5</sub> N |                           |                                                                                                                                         |                                                                                     |
| hcp | 55 | 15    | 7                         | 1                                                                    | <i>P6<sub>3</sub>mc</i>   | Al <sub>1-x</sub> Ga <sub>x</sub> N                                                                                                     |                                                                                     |
|     |    |       | 6                         |                                                                      |                           | MN M = Al, Ga, In, Tl, Mo                                                                                                               |                                                                                     |
|     |    |       | 2                         |                                                                      |                           | GeZnN <sub>2</sub> ; (Ga <sub>0.3333</sub> Ge <sub>0.3333</sub> Zn <sub>0.3333</sub> )N                                                 |                                                                                     |
|     |    | 5     | 3                         |                                                                      | <i>Pna2<sub>1</sub></i>   | MGeN <sub>2</sub> M = Zn, Mg, Mn                                                                                                        |                                                                                     |
|     |    |       | 2                         |                                                                      |                           | (ZnGeN <sub>2</sub> ) <sub>0.98</sub> (GaN) <sub>0.04</sub> ;<br>(ZnGeN <sub>2</sub> ) <sub>0.95</sub> (GaN) <sub>0.1</sub>             |                                                                                     |
|     |    | 3     |                           |                                                                      | <i>P6<sub>3</sub>/mmc</i> | MN M = Nb, Ta                                                                                                                           |                                                                                     |
|     |    | 2     |                           |                                                                      | <i>Cmc2<sub>1</sub></i>   | Mg <sub>2</sub> SbN <sub>3</sub> ; LiGe <sub>2</sub> N <sub>3</sub>                                                                     |                                                                                     |
|     |    | 1     |                           |                                                                      | <i>Pmn2<sub>1</sub></i>   | Zn <sub>3</sub> MoN <sub>4</sub>                                                                                                        |                                                                                     |
|     |    | 1     |                           |                                                                      | <i>P2<sub>1</sub></i>     | ZnGeN <sub>2</sub>                                                                                                                      |                                                                                     |
|     |    | 5     |                           |                                                                      | 0.67                      | <i>P-3m1</i>                                                                                                                            | M(1)M(2) <sub>2</sub> N <sub>2</sub><br>M(1) = AEM, Zr, Ce;<br>M(2) = Li, Mg, Be    |
|     |    | 2     |                           |                                                                      |                           |                                                                                                                                         | <i>P-3</i>                                                                          |
|     |    | 2     |                           |                                                                      |                           | <i>P2<sub>1</sub>/c</i>                                                                                                                 | LiCaMN <sub>2</sub> M = Al, Ga                                                      |
|     |    | 2     |                           |                                                                      |                           | <i>C2/m</i>                                                                                                                             | M <sub>3</sub> N <sub>2</sub> M = Mg, Ca                                            |
|     |    | 1     |                           |                                                                      |                           | <i>P2<sub>1</sub>/m</i>                                                                                                                 | Li <sub>3</sub> Ca <sub>2</sub> V <sub>0.79</sub> Nb <sub>0.21</sub> N <sub>4</sub> |
|     |    | 1     |                           |                                                                      | 0.5                       | <i>P6<sub>3</sub>/mmc</i>                                                                                                               | Re <sub>2</sub> N                                                                   |
|     |    | 1     |                           | <i>P6<sub>3</sub>mc</i>                                              |                           | NaSnN                                                                                                                                   |                                                                                     |
|     |    | 1     |                           | <i>Pbna</i>                                                          |                           | Mn <sub>2</sub> N                                                                                                                       |                                                                                     |
|     |    | 1     |                           | <i>P1</i>                                                            |                           | Fe <sub>2</sub> N                                                                                                                       |                                                                                     |
|     |    | 1     |                           | <i>Pbcn</i>                                                          |                           | Fe <sub>2</sub> N                                                                                                                       |                                                                                     |
|     |    | 1     |                           | 0.75                                                                 | <i>P6<sub>3</sub>/mmc</i> | Ca <sub>2</sub> Mg <sub>5</sub> GeN <sub>6</sub>                                                                                        |                                                                                     |
|     |    | 1     |                           |                                                                      | <i>P6<sub>3</sub>/m</i>   | Sr <sub>3</sub> CrN <sub>3</sub>                                                                                                        |                                                                                     |
|     |    | 1     |                           |                                                                      | <i>P2<sub>1</sub>/c</i>   | Ca <sub>3</sub> AlN <sub>3</sub>                                                                                                        |                                                                                     |
|     |    | 2     |                           | 0.6                                                                  | <i>R-3</i>                | Li <sub>6</sub> M <sub>2</sub> Mn <sub>2</sub> N <sub>6</sub> M = Ca, Sr                                                                |                                                                                     |
|     |    | 2     | 1                         | 0.33                                                                 | <i>P6<sub>3</sub>/mmc</i> | Li <sub>3</sub> N                                                                                                                       |                                                                                     |
|     |    |       | 1                         |                                                                      | <i>Pnma</i>               | Na <sub>3</sub> N                                                                                                                       |                                                                                     |
|     |    | 1     |                           | 1.1                                                                  | <i>P6<sub>3</sub>mc</i>   | Mo <sub>0.93</sub> N                                                                                                                    |                                                                                     |
|     |    | 1     |                           | 0.91                                                                 | <i>P31c</i>               | W <sub>1.1</sub> N                                                                                                                      |                                                                                     |
| 1   |    | 0.83  | <i>P6<sub>3</sub>/mmc</i> | Mg <sub>3</sub> Al <sub>3</sub> N <sub>5</sub>                       |                           |                                                                                                                                         |                                                                                     |
| 1   |    | 0.8   | <i>P-3m1</i>              | Mg <sub>3</sub> Al <sub>2</sub> N <sub>4</sub>                       |                           |                                                                                                                                         |                                                                                     |

|                                      |    |      |                           |                                                                  |                           |                                                                                                                                                                               |                                          |
|--------------------------------------|----|------|---------------------------|------------------------------------------------------------------|---------------------------|-------------------------------------------------------------------------------------------------------------------------------------------------------------------------------|------------------------------------------|
| <b>crs</b>                           | 45 | 43   | 20                        | 0.17                                                             | <i>Fd-3m</i>              | M(1) <sub>4</sub> M(2) <sub>2</sub> N M = <i>d</i> -metals                                                                                                                    |                                          |
|                                      |    |      | 12                        |                                                                  |                           | M(1) <sub>3</sub> M(2) <sub>3</sub> N M = <i>d</i> -metals                                                                                                                    |                                          |
|                                      |    |      | 7                         |                                                                  |                           | (M(1) <sub>a</sub> M(2) <sub>b</sub> M(3) <sub>c</sub> M(4) <sub>d</sub> M(5) <sub>e</sub> ) <sub>6</sub> N<br>M = <i>d</i> -metals, Al, Ge, Ga<br><i>a, b, c, d, e</i> = 0–3 |                                          |
|                                      |    |      | 2                         |                                                                  |                           | Li <sub>2</sub> (M <sub>3</sub> N) <sub>2</sub> Ga <sub>4</sub> M = Ca, Sr                                                                                                    |                                          |
|                                      |    |      | 2                         |                                                                  |                           | M(1) <sub>2.5</sub> M(2) <sub>3.5</sub> N M = Mn, Nb, Zr, V                                                                                                                   |                                          |
|                                      |    | 2    | 1                         | 1                                                                | <i>Fd-3m</i>              | CsNbN <sub>2</sub>                                                                                                                                                            |                                          |
|                                      |    |      | 1                         |                                                                  | <i>I4<sub>1</sub></i>     | Cs <sub>5</sub> NaW <sub>4</sub> N <sub>10</sub>                                                                                                                              |                                          |
| <b>lcy</b>                           | 44 | 29   |                           | 0.2                                                              | <i>P4<sub>1</sub>32</i>   | M(1) <sub>2-x</sub> M(2) <sub>x</sub> Mo <sub>3</sub> N M = <i>d</i> -metals                                                                                                  |                                          |
|                                      |    | 8    |                           |                                                                  |                           | M(1) <sub>2</sub> M(2) <sub>3</sub> N M = <i>d</i> -metals, Ga Al                                                                                                             |                                          |
|                                      |    | 5    |                           |                                                                  |                           | M(1)M(2)Mo <sub>3</sub> N M = <i>d</i> -metals                                                                                                                                |                                          |
|                                      |    | 2    |                           |                                                                  |                           | (Fe <sub>a</sub> Pt <sub>b</sub> Mo <sub>c</sub> ) <sub>5</sub> N <i>a, b, c</i> = 0.56–2.81                                                                                  |                                          |
| <b>bct</b>                           | 27 | 24   | 14                        | 0.077                                                            | <i>I4/mmm</i>             | M(1)M(2) <sub>2</sub> Fe <sub>10</sub> N<br>M(1) = Ln, Y; M(2) = Mo, V                                                                                                        |                                          |
|                                      |    |      | 9                         |                                                                  |                           | M(1)M(2)Fe <sub>11</sub> N<br>M(1) = REM; M(2) = Ti, Mo                                                                                                                       |                                          |
|                                      |    |      | 1                         |                                                                  |                           | NdFe <sub>10.44</sub> Mo <sub>1.56</sub> N                                                                                                                                    |                                          |
|                                      |    |      |                           |                                                                  |                           |                                                                                                                                                                               |                                          |
|                                      |    | 3    | 2                         | 0.5                                                              | <i>P4<sub>2</sub>/mnm</i> | Mn <sub>2-x</sub> Li <sub>x</sub> N                                                                                                                                           |                                          |
|                                      |    |      | 1                         |                                                                  |                           | Ti <sub>2</sub> N                                                                                                                                                             |                                          |
| <b>tca</b>                           | 25 | 9    | 4                         | 1                                                                | <i>P6<sub>3</sub>/mmc</i> | M(1)M(2)N <sub>2</sub><br>M = <i>d</i> -metals, Mg, Ba, Ce                                                                                                                    |                                          |
|                                      |    |      | 2                         |                                                                  |                           | W <sub>2-x</sub> M <sub>x</sub> N <sub>2</sub> M = Li, Fe                                                                                                                     |                                          |
|                                      |    |      | 2                         |                                                                  |                           | Mn(Ta <sub>a</sub> Ti <sub>b</sub> ) <sub>3</sub> N <sub>4</sub> <i>a, b</i> = 0–3                                                                                            |                                          |
|                                      |    |      | 1                         |                                                                  |                           | MoN                                                                                                                                                                           |                                          |
|                                      |    | 4    | 2                         |                                                                  | <i>P6<sub>3</sub>/mcm</i> | Ta <sub>4-x</sub> Li <sub>x</sub> N <sub>4</sub><br>M(1) <sub>3-x</sub> M(2) <sub>x</sub> N <sub>3</sub><br>M(1) = Nb, Ta; M(2) = Mg, Mn                                      |                                          |
|                                      |    |      | 2                         |                                                                  |                           |                                                                                                                                                                               |                                          |
|                                      |    | 2    | 1                         |                                                                  | <i>P-31c</i>              | FeWN <sub>2</sub>                                                                                                                                                             |                                          |
|                                      |    |      | 1                         |                                                                  |                           | (Fe <sub>0.81</sub> Mo <sub>0.19</sub> )MoN <sub>2</sub>                                                                                                                      |                                          |
|                                      |    | 1    |                           |                                                                  | <i>P6<sub>3</sub>mc</i>   | ZnMoN <sub>2</sub>                                                                                                                                                            |                                          |
|                                      |    | 2    |                           |                                                                  | 1.2                       | <i>P6<sub>3</sub>/mcm</i>                                                                                                                                                     | M <sub>5</sub> N <sub>6</sub> M = Nb, Ta |
|                                      |    | 1    |                           |                                                                  | 1.56                      | <i>P6<sub>3</sub>/mmc</i>                                                                                                                                                     | W <sub>2.56</sub> N <sub>4</sub>         |
|                                      |    | 1    |                           |                                                                  | 1.24                      | <i>P6<sub>3</sub>/mcm</i>                                                                                                                                                     | Ta <sub>4.82</sub> N <sub>6</sub>        |
|                                      |    | 1    |                           |                                                                  | 1.22                      | <i>P6<sub>3</sub>/mmc</i>                                                                                                                                                     | Mo <sub>0.82</sub> N                     |
|                                      |    | 1    |                           |                                                                  | 1.18                      | <i>P6<sub>3</sub>/mmc</i>                                                                                                                                                     | Mo <sub>1.7</sub> N <sub>2</sub>         |
| 1                                    |    | 1.15 | <i>P6<sub>3</sub>/mmc</i> | Fe <sub>0.74</sub> WN <sub>2</sub>                               |                           |                                                                                                                                                                               |                                          |
| 1                                    |    | 1.11 | <i>P6<sub>3</sub>/mmc</i> | Mo <sub>1.8</sub> N <sub>2</sub>                                 |                           |                                                                                                                                                                               |                                          |
| 1                                    |    | 0.87 | <i>P6<sub>3</sub>/mmc</i> | W <sub>4.6</sub> N <sub>4</sub>                                  |                           |                                                                                                                                                                               |                                          |
| <b>reo</b>                           | 18 | 11   | 8                         | 0.16                                                             | <i>R-3m</i>               | Ln <sub>2</sub> M <sub>17</sub> N <sub>3</sub> M = Fe, Co                                                                                                                     |                                          |
|                                      |    |      | 3                         |                                                                  |                           | Ln <sub>2</sub> (Fe <sub>17-x</sub> Co <sub>x</sub> )N <sub>3</sub>                                                                                                           |                                          |
|                                      |    | 3    | 2                         | 0.21                                                             | <i>Fm-3m</i>              | Na <sub>14</sub> Ba <sub>14</sub> MN <sub>6</sub> M = Li, Ca                                                                                                                  |                                          |
|                                      |    |      | 1                         |                                                                  | <i>Fm-3c</i>              | LaFe <sub>10.8</sub> Al <sub>2.2</sub> N <sub>3</sub>                                                                                                                         |                                          |
|                                      |    | 2    |                           | 0.2                                                              | <i>F-43m</i>              | (Na <sub>15-x</sub> Li <sub>x</sub> )Ba <sub>14</sub> LiN <sub>6</sub>                                                                                                        |                                          |
|                                      |    | 1    |                           | 1.5                                                              | <i>Pm-3m</i>              | TaThN <sub>3</sub>                                                                                                                                                            |                                          |
| 1                                    |    | 0.17 | <i>R-3m</i>               | Na <sub>15</sub> Li <sub>8</sub> Ba <sub>12</sub> N <sub>6</sub> |                           |                                                                                                                                                                               |                                          |
| 10 <sup>2</sup> , 11 <sup>2</sup> T1 | 9  | 4    |                           | 1                                                                | <i>Pbca</i>               | M(1) <sub>3</sub> M(2)N <sub>4</sub><br>M(1) = Sr, Ba; M(2) = Mo, W, Cr                                                                                                       |                                          |
|                                      |    | 3    |                           |                                                                  |                           | Sr <sub>3-x</sub> Ba <sub>x</sub> MN <sub>4</sub> M = W, Mo                                                                                                                   |                                          |
|                                      |    | 1    |                           |                                                                  |                           | Ca <sub>2</sub> SrWN <sub>4</sub>                                                                                                                                             |                                          |

|                               |   |   |       |                           |                                                                                                                  |                                                       |
|-------------------------------|---|---|-------|---------------------------|------------------------------------------------------------------------------------------------------------------|-------------------------------------------------------|
|                               |   | 1 |       |                           | $\text{Ba}(\text{Ba}_{0.44}\text{Ca}_{0.56})\text{CaWN}_4$                                                       |                                                       |
| 11T106                        | 9 | 5 | 0.8   | <i>I4/m</i>               | $\text{M}(\text{1})\text{Mg}_2\text{M}(\text{2})_2\text{N}_4$<br>M(1) = REM, Eu; M(2) = Al, Ga                   |                                                       |
|                               |   | 2 |       |                           | $\text{Ba}(\text{Mg}_{3.33}\text{M}_{0.67})\text{N}_4$ M = Nb, Ta                                                |                                                       |
|                               |   | 1 |       |                           | $\text{BaMg}_3\text{GeN}_4$                                                                                      |                                                       |
|                               |   | 1 |       |                           | $(\text{Sr}_{0.985}\text{Ce}_{0.015})(\text{Mg}_{2.03}\text{Al}_{1.97})\text{N}_4$                               |                                                       |
| nce                           | 8 | 5 | 0.67  | <i>I4/mmm</i>             | $\text{M}_2\text{ZnN}_2$ M = REM                                                                                 |                                                       |
|                               |   |   |       |                           | 3                                                                                                                | $\text{Mn}_3\text{N}_2$                               |
|                               |   |   |       |                           | 1                                                                                                                | $\text{Mo}(\text{Mo}_{0.5}\text{Ta}_{1.5})\text{N}_2$ |
|                               |   | 1 | 0.18  | <i>F4/mmm</i>             | $\text{Mn}_3\text{N}_2$                                                                                          |                                                       |
|                               |   | 2 |       | <i>Pmmn</i>               | $\text{M}_6\text{Ge}_5\text{N}_2$ M = Sr, Ba                                                                     |                                                       |
| mob                           | 7 | 5 | 0.4   | <i>I4<sub>1</sub>/amd</i> | $\text{M}(\text{1})\text{Li}_2(\text{Li}_{1-x}\text{M}(\text{2})_x)_2\text{N}_2$<br>M(1) = Sr, Ca; M(2) = Cu, Fe |                                                       |
|                               |   | 1 |       |                           | $\text{Li}_4\text{SrN}_2$                                                                                        |                                                       |
|                               |   | 1 |       |                           | $(\text{Li}_{3.9}\text{Ni}_{0.1})\text{SrN}_2$                                                                   |                                                       |
| 12,13T2334                    | 6 |   | 0.8   | <i>Pnna</i>               | $\text{M}(\text{1})_3\text{M}(\text{2})_2\text{N}_4$<br>M(1) = Sr, Ba;<br>M(2) = Al, Ga, Ge, Mg                  |                                                       |
| hcp-10-<br>P6 <sub>3</sub> /m | 6 |   | 0.75  | <i>P6<sub>3</sub>/m</i>   | $\text{M}(\text{1})_3\text{M}(\text{2})\text{N}_3$<br>M(1) = Sr, Ba; M(2) = Mn, Cr, Fe, Ga                       |                                                       |
| 12T2355                       | 5 |   | 1.5   | <i>Ia-3</i>               | $\text{M}_2\text{N}_3$ M = Ln, Ta, Zr, U                                                                         |                                                       |
| tcd                           | 5 | 4 | 1     | <i>R3m</i>                | $\text{M}(\text{1})\text{M}(\text{2})\text{N}_2$ M = Cr, Mo, W, Li                                               |                                                       |
|                               |   |   |       |                           | 3                                                                                                                | <i>R-3m</i>                                           |
|                               |   | 1 | 1.5   | <i>R3</i>                 | $\text{W}_2\text{N}_3$                                                                                           |                                                       |
| 7,12T29                       | 5 | 4 | 1.2   | <i>I4/mmm</i>             | $\text{La}_3\text{M}_2\text{N}_6$ M = V, Nb, Ta, Cr                                                              |                                                       |
|                               |   | 1 | 1.21  |                           | $\text{Ce}_3\text{Ta}_{1.97}\text{N}_6$                                                                          |                                                       |
| tcj                           | 5 | 1 | 1.33  | <i>Pna2<sub>1</sub></i>   | $\text{Zr}_3\text{N}_4$                                                                                          |                                                       |
|                               |   | 1 |       | <i>Pnam</i>               | $\text{Zr}_3\text{N}_4$                                                                                          |                                                       |
|                               |   | 1 | 1     | <i>P6<sub>3</sub>/mmc</i> | NbN                                                                                                              |                                                       |
|                               |   | 1 |       | <i>P6<sub>3</sub>mc</i>   | $\text{MnWN}_2$                                                                                                  |                                                       |
|                               |   | 1 |       | <i>P6<sub>3</sub>/mmc</i> | $\text{Be}_3\text{N}_2$                                                                                          |                                                       |
| bcu-x                         | 5 | 2 | 0.045 | <i>Im-3m</i>              | $\text{Na}_{16}\text{Ba}_6\text{N}$ ; $\text{Ag}_{16}\text{Ca}_6\text{N}$                                        |                                                       |
|                               |   | 2 | 0.67  | <i>R-3c</i>               | $\text{Ca}_3\text{N}_2$                                                                                          |                                                       |
|                               |   |   |       | <i>Pbcn</i>               | $\text{Zn}_3\text{N}_2$                                                                                          |                                                       |
|                               |   | 1 | 0.125 | <i>I4/mmm</i>             | $\text{Fe}_{16}\text{N}_2$                                                                                       |                                                       |
| 9,10 <sup>2</sup> ,11T2       | 4 |   | 1     | <i>Pbca</i>               | $\text{Ba}_{3-x}\text{M}(\text{1})_x\text{M}(\text{2})\text{N}_4$<br>M(1) = Sr, Ca; M(2) = Mo, W                 |                                                       |
| 10 <sup>2</sup> ,11,12T2      | 4 |   | 1     | <i>C2/c</i>               | $\text{M}(\text{1})_2\text{M}(\text{2})\text{N}_3$<br>M(1) = Sr, Ba; M(2) = Nb, V, Ta                            |                                                       |
| 9,10T2662                     | 4 | 3 | 0.75  | <i>Cmcm</i>               | $\text{Ca}_3\text{MN}_3$ M = V, Cr, Mn                                                                           |                                                       |
|                               |   | 1 |       | <i>P2<sub>1</sub>/m</i>   | $\text{Ca}_3\text{VN}_3$                                                                                         |                                                       |
| 9,10T2652                     | 4 |   | 0.71  | <i>P6<sub>3</sub>/mcm</i> | $\text{M}(\text{1})_6\text{M}(\text{2})\text{N}_5$<br>M(1) = Ca, Sr; M(2) = Ga, Fe, Mn                           |                                                       |
| 14T2                          | 4 | 2 | 0.33  | <i>P6<sub>3</sub>22</i>   | $\text{M}_3\text{N}$ M = Fe, Ni                                                                                  |                                                       |
|                               |   | 1 |       | <i>P6<sub>3</sub></i>     | $\text{Fe}_3\text{N}$                                                                                            |                                                       |
|                               |   | 1 |       | <i>P312</i>               | $\text{Fe}_3\text{N}$                                                                                            |                                                       |
| 11T1587                       | 3 |   | 1.5   | <i>Ia-3</i>               | $\text{M}_2\text{N}_3$ M = Ho, Lu, Np                                                                            |                                                       |
| 10,12T215                     | 3 | 2 | 1     | <i>P2<sub>1</sub>/m</i>   | $\text{LiM}_2\text{ReN}_4$ M = Sr, Ba                                                                            |                                                       |
|                               |   | 1 |       | <i>Pnma</i>               | $\text{UVN}_2$                                                                                                   |                                                       |

|                                          |   |   |      |                           |                                                                                                                                                                                             |
|------------------------------------------|---|---|------|---------------------------|---------------------------------------------------------------------------------------------------------------------------------------------------------------------------------------------|
| 8,12T48                                  | 3 |   | 1    | <i>P4/nmm</i>             | M(1)M(2)N <sub>2</sub><br>M(1) = Ba, Sr; M(2) = Ti, Zr, Hf                                                                                                                                  |
| <b>tcl</b>                               | 3 | 2 | 0.75 | <i>R-3m</i>               | Mg <sub>3</sub> MN <sub>3</sub> M = Al, Ga                                                                                                                                                  |
|                                          |   | 1 | 0.6  |                           | Li <sub>2</sub> Ca <sub>2.78</sub> Nb <sub>0.22</sub> N <sub>3</sub>                                                                                                                        |
| 11 <sup>2</sup> ,12T10                   | 3 |   | 0.67 | <i>I4/m</i>               | MBe <sub>20</sub> N <sub>14</sub> M = Sr, Ba, Eu                                                                                                                                            |
| <b>svi-x</b>                             | 3 |   | 0.67 | <i>I4/mcm</i>             | MBe <sub>2</sub> N <sub>2</sub> M = Ca, Sr, Ba                                                                                                                                              |
| 9T980                                    | 3 |   | 0.57 | <i>P4/ncc</i>             | Ca <sub>4</sub> Ba(MN <sub>2</sub> ) <sub>2</sub> M = Cu, Co; Ca <sub>5</sub> (CoN <sub>2</sub> ) <sub>2</sub>                                                                              |
| 11,12T2                                  | 3 | 2 | 0.5  | <i>P-31m</i>              | M <sub>2</sub> N M = Cr, Fe                                                                                                                                                                 |
|                                          |   | 1 |      | <i>P312</i>               | Fe <sub>2</sub> N                                                                                                                                                                           |
| 8,9T1103                                 | 3 | 2 | 0.5  | <i>Pbam</i>               | (Ca <sub>7</sub> N <sub>4</sub> )Tl <sub>0.97</sub> ; (Ca <sub>7</sub> N <sub>4</sub> )In <sub>1.02</sub>                                                                                   |
|                                          |   | 1 | 0.48 |                           | (Ca <sub>7</sub> N <sub>4</sub> )Ga <sub>1.34</sub>                                                                                                                                         |
| 7 <sup>2</sup> ,8,9T5                    | 3 |   | 0.42 | <i>P4<sub>2</sub>/n</i>   | Ba <sub>23</sub> Na <sub>11</sub> (MN <sub>4</sub> ) <sub>4</sub> M = Nb, Ta;<br>Ba <sub>23</sub> Na <sub>11</sub> N <sub>12</sub> ((Ta <sub>0.28</sub> V <sub>3.72</sub> )N <sub>4</sub> ) |
| 7,9T74                                   | 3 |   | 0.4  | <i>P2<sub>1</sub>/m</i>   | M <sub>3</sub> Ge <sub>2</sub> N <sub>2</sub> M = Sr, Ba                                                                                                                                    |
| <b>chb</b>                               | 3 |   | 0.33 | <i>Cmcm</i>               | M(1) <sub>2</sub> M(2)N<br>M(1) = Ca, Sr; M(2) = Au, In                                                                                                                                     |
| <b>fab</b>                               | 3 |   | 0.26 | <i>Fm-3m</i>              | M(1) <sub>19</sub> M(2) <sub>8</sub> N <sub>7</sub><br>M(1) = Ca, Sr; M(2) = In, Ag                                                                                                         |
| <b>lon</b>                               | 3 |   | 0.25 | <i>P6<sub>3</sub>/mmc</i> | (Ba <sub>3-x</sub> Sr <sub>x</sub> )MN M = Bi, Sb                                                                                                                                           |
| <b>tsi</b>                               | 3 | 2 | 0.17 | <i>I4<sub>1</sub>/amd</i> | M <sub>4</sub> In <sub>2</sub> N M = Ca, Sr                                                                                                                                                 |
|                                          |   | 1 | 0.5  |                           | Ti <sub>2</sub> N                                                                                                                                                                           |
| 11,12 <sup>2</sup> T4                    | 2 | 1 | 1.67 | <i>Cmcm</i>               | Ta <sub>3</sub> N <sub>5</sub>                                                                                                                                                              |
|                                          |   | 1 |      | <i>C2/m</i>               |                                                                                                                                                                                             |
| <b>hcp-10-R-3c</b>                       | 2 | 1 | 1.5  | <i>R3c</i>                | LaWN <sub>3</sub>                                                                                                                                                                           |
|                                          |   | 1 |      | <i>I-1</i>                | LaReN <sub>3</sub>                                                                                                                                                                          |
| 11,12T2507                               | 2 |   | 1.5  | <i>P1</i>                 | CeMN <sub>3</sub> M = Mo, W                                                                                                                                                                 |
| 11T2                                     | 2 |   | 1.33 | <i>I-43d</i>              | M <sub>3</sub> N <sub>4</sub> M = Zr, Hf                                                                                                                                                    |
| 12T2171                                  | 2 | 1 | 1.29 | <i>I-42d</i>              | Ca <sub>0.55</sub> GeN <sub>2</sub>                                                                                                                                                         |
|                                          |   | 1 | 1    |                           | CaGeN <sub>2</sub>                                                                                                                                                                          |
| 8,10T340                                 | 2 |   | 1    | <i>Immm</i>               | MCE <sub>2</sub> N <sub>3</sub> M = Cr, Mn                                                                                                                                                  |
| 6,10T202                                 | 2 |   | 1    | <i>Immm</i>               | MTh <sub>2</sub> N <sub>3</sub> M = Cr, Mn                                                                                                                                                  |
| 6,8T535                                  | 2 |   | 1    | <i>Immm</i>               | MU <sub>2</sub> N <sub>3</sub> M = Cr, Mn                                                                                                                                                   |
| 10,12T218                                | 2 | 1 | 1    | <i>Pmmn</i>               | CaTiN <sub>2</sub>                                                                                                                                                                          |
|                                          |   | 1 |      | <i>P2<sub>1</sub>mn</i>   |                                                                                                                                                                                             |
| 12,14T1608                               | 2 |   | 1    | <i>Cmc2<sub>1</sub></i>   | NaGe <sub>2</sub> N <sub>3</sub> ; (Ca <sub>0.8</sub> Li <sub>0.2</sub> )(Al <sub>0.8</sub> Ge <sub>1.2</sub> )N <sub>3</sub>                                                               |
| 11 <sup>3</sup> ,12T3                    | 2 |   | 1    | <i>C2/c</i>               | La <sub>2</sub> GaN <sub>3</sub> ; Sr <sub>2</sub> TaN <sub>3</sub>                                                                                                                         |
| 9,10 <sup>3</sup> ,11 <sup>3</sup> ,13T1 | 2 |   | 1    | <i>P2/n</i>               | LiBa <sub>4</sub> M <sub>2</sub> N <sub>7</sub> M = Mo, W                                                                                                                                   |
| 6,7,8T23                                 | 2 | 1 | 0.96 | <i>R-3c</i>               | Cs <sub>9.67</sub> W <sub>6</sub> N <sub>15</sub>                                                                                                                                           |
|                                          |   | 1 | 0.94 |                           | Cs <sub>9.98</sub> Mo <sub>6</sub> N <sub>15</sub>                                                                                                                                          |
| 9,10 <sup>2</sup> ,15T1                  | 2 |   | 0.83 | <i>Pbcm</i>               | Ca <sub>5</sub> (VN <sub>4</sub> )N; Sr <sub>5</sub> (NbN <sub>4</sub> )N                                                                                                                   |
| 10,11,12T8                               | 2 |   | 0.83 | <i>C2/m</i>               | Ca <sub>4</sub> Ge <sub>3</sub> Mg <sub>5</sub> N <sub>10</sub> ; Ca <sub>2</sub> MgGa <sub>3</sub> N <sub>5</sub>                                                                          |
| 12,13T1230                               | 2 |   | 0.8  | <i>C2/c</i>               | Ca <sub>3</sub> M <sub>2</sub> N <sub>4</sub> M = Al, Ga                                                                                                                                    |
| <b>tci</b>                               | 2 |   | 0.75 | <i>R-3</i>                | Ca <sub>6</sub> Ge <sub>2</sub> N <sub>6</sub> M = Ca, Sr                                                                                                                                   |
| 11 <sup>2</sup> ,12T11                   | 2 |   | 0.75 | <i>Pbcn</i>               | M <sub>7</sub> (GeN <sub>4</sub> )N <sub>2</sub> M = Ca, Sr                                                                                                                                 |
| 10 <sup>2</sup> ,11,12,13,14T1           | 2 |   | 0.75 | <i>Cc</i>                 | Na <sub>3</sub> MN <sub>3</sub> M = Mo, W                                                                                                                                                   |
| 9,10 <sup>3</sup> T5                     | 2 |   | 0.73 | <i>C2/m</i>               | Sr <sub>8</sub> (MN <sub>3</sub> ) <sub>2</sub> (FeN <sub>2</sub> ) M = Mn, Fe                                                                                                              |
| 9,11T2523                                | 2 |   | 0.67 | <i>P4<sub>2</sub>/mbc</i> | M <sub>2</sub> GeN <sub>2</sub> M = Ca, Sr                                                                                                                                                  |
| 11,12T2508                               | 2 |   | 0.67 | <i>Pnmm</i>               | Li <sub>3</sub> Sr <sub>2</sub> MN <sub>4</sub> M = Nb, Ta                                                                                                                                  |

|                                                                                                 |   |   |       |                           |                                                                                                         |
|-------------------------------------------------------------------------------------------------|---|---|-------|---------------------------|---------------------------------------------------------------------------------------------------------|
| 11,12T2063                                                                                      | 2 |   | 0.67  | <i>C2/c</i>               | $\text{Li}_3\text{Ba}_2\text{MN}_4$ M = Nb, Ta                                                          |
| $10^2\text{T2411}$                                                                              | 2 |   | 0.6   | <i>C2/c</i>               | $\text{M}_2\text{LiFe}_2\text{N}_3$ M = Sr, Ba                                                          |
| <b>svk</b>                                                                                      | 2 | 1 | 0.4   | <i>Immm</i>               | $\text{Li}_3\text{Sr}_3\text{Ni}_4\text{N}_4$                                                           |
|                                                                                                 |   | 1 | 0.2   | <i>Cmmm</i>               | $\text{Ca}_7\text{Ti}_3\text{N}_2$                                                                      |
| 7,10T482                                                                                        | 2 |   | 0.33  | <i>Immm</i>               | $\text{M}_8\text{Cu}_3\text{In}_4\text{N}_5$ M = Sr, Ba                                                 |
| 8,9,16 <sup>2</sup> T1                                                                          | 2 |   | 0.076 | <i>I-42m</i>              | $\text{Ba}_{39}\text{Li}_{80}\text{N}_9$ ; $\text{Ba}_{39}\text{Li}_{34.87}\text{In}_{45.13}\text{N}_9$ |
| $10^3,12\text{T2}$                                                                              | 1 |   | 1.7   | <i>P-6</i>                | $\text{W}_7\text{N}_{12}$                                                                               |
| $10^4,12\text{T2}$                                                                              | 1 |   | 1.67  | <i>Pnma</i>               | $\text{Ta}_3\text{N}_5$                                                                                 |
| $10^2,12^2\text{T6}$                                                                            | 1 |   | 1.67  | <i>Pnma</i>               | $\text{Ta}_3\text{N}_5$                                                                                 |
| <b>tck-8,10-</b><br><b>P6<sub>3</sub>/mmc</b>                                                   | 1 |   | 1.5   | <i>P6<sub>3</sub>/mmc</i> | $\text{W}_2\text{N}_3$                                                                                  |
| 9,10,11T12                                                                                      | 1 |   | 1.5   | <i>Pnma</i>               | $\text{Nb}_2\text{N}_3$                                                                                 |
| $11^2\text{T2280}$                                                                              | 1 |   | 1.33  | <i>P6<sub>3</sub>/m</i>   | $\text{Ge}_3\text{N}_4$                                                                                 |
| 9,11 <sup>3</sup> T1                                                                            | 1 |   | 1.33  | <i>P31c</i>               | $\text{Ge}_3\text{N}_4$                                                                                 |
| 11,12,13T5                                                                                      | 1 |   | 1.33  | <i>Pbnm</i>               | $\text{Sn}_3\text{N}_4$                                                                                 |
| 12,13T73                                                                                        | 1 |   | 1.33  | <i>P2<sub>1</sub>/n</i>   | $\text{Sn}_3\text{N}_4$                                                                                 |
| $10,12^2\text{T9}$                                                                              | 1 |   | 1.25  | <i>Cmcm</i>               | $\text{NaTa}_3\text{N}_5$                                                                               |
| <b>tcl-8,10-</b><br><b>P3<sub>2</sub>21</b>                                                     | 1 |   | 1.19  | <i>R-3m</i>               | $\text{Nb}_{0.84}\text{N}$                                                                              |
| <b>tck</b>                                                                                      | 1 |   | 1.125 | <i>P6<sub>3</sub>/mcm</i> | $\text{Nb}_{3.72}\text{Ta}_{4.28}\text{N}_9$                                                            |
| <b>kag</b>                                                                                      | 1 |   | 1     | <i>P6/mmm</i>             | TaN                                                                                                     |
| <b>bnn</b>                                                                                      | 1 |   | 1     | <i>P-3m1</i>              | MoN                                                                                                     |
| 6,9T412                                                                                         | 1 |   | 1     | <i>P-31m</i>              | MoN                                                                                                     |
| $10^2,11^2\text{T1}$                                                                            | 1 |   | 1     | <i>P31c</i>               | $\text{Ba}_3\text{MoN}_4$                                                                               |
| $9^5,10^6,11\text{T1}$                                                                          | 1 |   | 1     | <i>P31c</i>               | $\text{Ba}_3\text{WN}_4$                                                                                |
| 10T4                                                                                            | 1 |   | 1     | <i>I4<sub>1</sub>/amd</i> | $\text{LiUN}_2$                                                                                         |
| 10,11T2644                                                                                      | 1 |   | 1     | <i>Fddd</i>               | $\text{Ba}_2\text{CaWN}_4$                                                                              |
| 10,11,13T9                                                                                      | 1 |   | 1     | <i>Cmca</i>               | $\text{Ba}_2\text{VN}_3$                                                                                |
| $10^2,11^2\text{T3}$                                                                            | 1 |   | 1     | <i>Pbca</i>               | $\text{Ba}_2(\text{Ba}_{0.23}\text{Ca}_{0.77})\text{MoN}_4$                                             |
| 9,10,11 <sup>3</sup> ,12<br>T1                                                                  | 1 |   | 1     | <i>C2/c</i>               | $\text{Sr}_3\text{MoN}_4$                                                                               |
| $10^3,11\text{T1}$                                                                              | 1 |   | 1     | <i>C2/c</i>               | $\text{Ca}_2\text{VN}_3$                                                                                |
| $10^2,11^2,12^3$<br>T1                                                                          | 1 |   | 1     | <i>P-1</i>                | $\text{Sr}_{10}(\text{Mo}_2\text{N}_6)(\text{MoN}_4)_2$                                                 |
| 7,8,9T13                                                                                        | 1 |   | 0.99  | <i>R-3c</i>               | $\text{Rb}_{9.15}\text{W}_6\text{N}_{15}$                                                               |
| 8,10,12,13<br>T1                                                                                | 1 |   | 0.9   | <i>Fm-3m</i>              | $\text{La}_3\text{Cr}_{9.236}\text{N}_{11}$                                                             |
| 9,10 <sup>9</sup> ,11 <sup>4</sup> ,<br>12 <sup>5</sup> T1                                      | 1 |   | 0.9   | <i>P-1</i>                | $\text{Ba}_{16}(\text{NbN}_4)_3(\text{Nb}_2\text{N}_7)$                                                 |
| $10^3,11\text{T2}$                                                                              | 1 |   | 0.875 | <i>Pnnm</i>               | $\text{Sr}_4\text{LiAl}_{11}\text{N}_{14}$                                                              |
| $10^2,11^2\text{T2}$                                                                            | 1 |   | 0.875 | <i>C2/m</i>               | $\text{Sr}_2\text{MgAl}_5\text{N}_7$                                                                    |
| $11^2,14\text{T3}$                                                                              | 1 |   | 0.86  | <i>C2/c</i>               | $\text{Sr}_5\text{Ge}_2\text{N}_6$                                                                      |
| 8,9,10 <sup>2</sup> ,11,<br>12T2                                                                | 1 |   | 0.86  | <i>P-1</i>                | $\text{Ba}_{10}\text{Ti}_4\text{N}_{12}$                                                                |
| 8 <sup>4</sup> ,9 <sup>5</sup> ,10 <sup>2</sup> ,<br>11 <sup>3</sup> ,12 <sup>4</sup> ,13<br>T1 | 1 |   | 0.86  | <i>P-1</i>                | $\text{Na}_2\text{K}_{13}\text{W}_7\text{N}_{19}$                                                       |
| $10,11^2,13^2$<br>T1                                                                            | 1 |   | 0.83  | <i>Pna2<sub>1</sub></i>   | $\text{Eu}_4\text{MgTaN}_5$                                                                             |
| $10,11^2,12,$                                                                                   | 1 |   | 0.83  | <i>C2/c</i>               | $\text{Ba}_3\text{Ga}_3\text{N}_5$                                                                      |

|                                                                  |   |      |                                                 |                                                                                                    |
|------------------------------------------------------------------|---|------|-------------------------------------------------|----------------------------------------------------------------------------------------------------|
| 14T1                                                             |   |      |                                                 |                                                                                                    |
| 7,8,9T12                                                         | 1 | 0.83 | <i>C2/m</i>                                     | Ba <sub>5</sub> (CrN <sub>4</sub> )N                                                               |
| 9,10,11,12 <sup>2</sup><br>T3                                    | 1 | 0.83 | <i>P-1</i>                                      | Sr <sub>3</sub> Ga <sub>3</sub> N <sub>5</sub>                                                     |
| 9,10,11 <sup>2</sup> ,13<br>T2                                   | 1 | 0.83 | <i>P-1</i>                                      | Al <sub>3</sub> BeSr <sub>2</sub> N <sub>5</sub>                                                   |
| 8,9 <sup>4</sup> ,10,11 <sup>2</sup> ,<br>12T1                   | 1 | 0.82 | <i>P2<sub>1</sub>/c</i>                         | Sr <sub>8</sub> (MnN <sub>3</sub> ) <sub>2</sub> (MnN <sub>3</sub> )                               |
| 11,12,13T6                                                       | 1 | 0.8  | <i>I4<sub>1</sub>/acd</i>                       | Ca <sub>3</sub> Ga <sub>2</sub> N <sub>4</sub>                                                     |
| 10,11 <sup>3</sup> T3                                            | 1 | 0.8  | <i>I4<sub>1</sub>/a</i>                         | CaLiAl <sub>3</sub> N <sub>4</sub>                                                                 |
| 10,12 <sup>2</sup> T10                                           | 1 | 0.8  | <i>Ibca</i>                                     | Ca <sub>4</sub> FeN <sub>4</sub>                                                                   |
| 10 <sup>2</sup> ,11 <sup>2</sup> ,13 <sup>4</sup><br>T1          | 1 | 0.8  | <i>P2<sub>1</sub>2<sub>1</sub>2<sub>1</sub></i> | Ca <sub>3</sub> Al <sub>2</sub> N <sub>4</sub>                                                     |
| 10,11,12,13<br>T5                                                | 1 | 0.8  | <i>P2<sub>1</sub>/c</i>                         | Ca <sub>4</sub> GeN <sub>4</sub>                                                                   |
| 10,11,14,15<br>T1                                                | 1 | 0.8  | <i>P2<sub>1</sub>/c</i>                         | Ca <sub>3</sub> Al <sub>2</sub> N <sub>4</sub>                                                     |
| 9,11,12 <sup>2</sup> T2                                          | 1 | 0.8  | <i>P2<sub>1</sub>/c</i>                         | Sr <sub>4</sub> GeN <sub>4</sub>                                                                   |
| 10,11 <sup>3</sup> T4                                            | 1 | 0.8  | <i>C2/m</i>                                     | CaBaLi <sub>2</sub> Al <sub>6</sub> N <sub>8</sub>                                                 |
| 10,11,12,13<br>T4                                                | 1 | 0.8  | <i>P-1</i>                                      | Ca <sub>4</sub> TiN <sub>4</sub>                                                                   |
| 10 <sup>3</sup> ,11 <sup>5</sup> T1                              | 1 | 0.8  | <i>P-1</i>                                      | SrLiAl <sub>3</sub> N <sub>4</sub>                                                                 |
| 10 <sup>2</sup> ,11 <sup>6</sup> T2                              | 1 | 0.8  | <i>P-1</i>                                      | Sr <sub>0.995</sub> LiAl <sub>3</sub> Eu <sub>0.005</sub> N <sub>4</sub>                           |
| 10,11 <sup>5</sup> ,12 <sup>2</sup><br>T1                        | 1 | 0.8  | <i>P-1</i>                                      | Sr <sub>0.595</sub> Ca <sub>0.4</sub> LiAl <sub>3</sub> Eu <sub>0.005</sub> N <sub>4</sub>         |
| <b>xak</b>                                                       | 1 | 0.75 | <i>I4/mmm</i>                                   | Nb <sub>4</sub> N <sub>3</sub>                                                                     |
| 11,12T911                                                        | 1 | 0.75 | <i>Pbca</i>                                     | Li <sub>4</sub> Sr <sub>2</sub> Cr <sub>2</sub> N <sub>6</sub>                                     |
| 9,10,12 <sup>3</sup> ,13<br>T1                                   | 1 | 0.75 | <i>Pbca</i>                                     | Na <sub>11</sub> Rb(WN <sub>3</sub> ) <sub>4</sub>                                                 |
| 10,11,12,13<br>T6                                                | 1 | 0.75 | <i>Pbcm</i>                                     | Na <sub>2</sub> KWN <sub>3</sub>                                                                   |
| 9,10 <sup>5</sup> ,11 <sup>2</sup> ,<br>12 <sup>2</sup> ,13,14T1 | 1 | 0.75 | <i>P2<sub>1</sub>/c</i>                         | Na <sub>5</sub> Rb(WN <sub>3</sub> ) <sub>2</sub>                                                  |
| 9 <sup>2</sup> ,10 <sup>6</sup> ,12 <sup>4</sup><br>T1           | 1 | 0.75 | <i>P2<sub>1</sub>/c</i>                         | Na <sub>5</sub> Cs(WN <sub>3</sub> ) <sub>2</sub>                                                  |
| 10,11,12 <sup>4</sup> T1                                         | 1 | 0.74 | <i>P3</i>                                       | Ca <sub>12</sub> Mn <sub>19</sub> N <sub>23</sub>                                                  |
| 11 <sup>2</sup> ,12T9                                            | 1 | 0.73 | <i>P4<sub>2</sub>/mnm</i>                       | Ca <sub>11</sub> N <sub>8</sub>                                                                    |
| 9,11T2471                                                        | 1 | 0.67 | <i>Cmca</i>                                     | Sr <sub>2</sub> GeN <sub>2</sub>                                                                   |
| 9,11T300                                                         | 1 | 0.67 | <i>Pnma</i>                                     | Fe <sub>3</sub> N <sub>2</sub>                                                                     |
| 9,10T225                                                         | 1 | 0.67 | <i>C2/m</i>                                     | Ca <sub>2</sub> FeN <sub>2</sub>                                                                   |
| 11,12 <sup>3</sup> T3                                            | 1 | 0.67 | <i>C2/m</i>                                     | LiSrGaN <sub>2</sub>                                                                               |
| 12 <sup>2</sup> T2342                                            | 1 | 0.67 | <i>C2/m</i>                                     | Li <sub>4</sub> Sr <sub>3</sub> Ge <sub>2</sub> N <sub>6</sub>                                     |
| 11 <sup>2</sup> ,12 <sup>2</sup> ,15<br>T2                       | 1 | 0.67 | <i>P-1</i>                                      | Sr <sub>2</sub> FeN <sub>2</sub>                                                                   |
| 7,8,9 <sup>2</sup> ,10 <sup>2</sup> ,<br>11T1                    | 1 | 0.61 | <i>P-1</i>                                      | Sr <sub>17</sub> Ge <sub>2</sub> (GeN <sub>3</sub> ) <sub>2</sub> (GeN <sub>4</sub> ) <sub>2</sub> |
| 10,12T2852                                                       | 1 | 0.6  | <i>P6<sub>3</sub>/mmc</i>                       | Ti <sub>4</sub> AlN <sub>3</sub>                                                                   |
| 12,13 <sup>2</sup> T8                                            | 1 | 0.6  | <i>Cc</i>                                       | Na <sub>4</sub> ReN <sub>3</sub>                                                                   |
| 10T1541                                                          | 1 | 0.57 | <i>P4/ncc</i>                                   | Sr <sub>5</sub> (CoN <sub>2</sub> ) <sub>2</sub>                                                   |
| 9,11T2522                                                        | 1 | 0.57 | <i>Cmca</i>                                     | Ca <sub>5</sub> Ga <sub>2</sub> N <sub>4</sub>                                                     |
| 12 <sup>2</sup> ,13T11                                           | 1 | 0.56 | <i>P4<sub>2</sub>mc</i>                         | Sr <sub>6</sub> (Cu <sub>2</sub> N <sub>3</sub> )(CuN <sub>2</sub> )                               |

|                                                     |   |       |                           |                                                                                        |
|-----------------------------------------------------|---|-------|---------------------------|----------------------------------------------------------------------------------------|
| <b>hxl</b>                                          | 1 | 0.5   | <i>P-3</i>                | W <sub>2</sub> N                                                                       |
| <b>dia</b>                                          | 1 | 0.5   | <i>I4<sub>1</sub>/amd</i> | Mo <sub>2</sub> N                                                                      |
| 11,12 <sup>4</sup> T1                               | 1 | 0.5   | <i>C2/c</i>               | Ba <sub>8</sub> Ni <sub>6</sub> N <sub>7</sub>                                         |
| 10,12T1513                                          | 1 | 0.43  | <i>Cmmm</i>               | (Li <sub>0.78</sub> Ni <sub>0.22</sub> )Li <sub>4</sub> Sr <sub>2</sub> N <sub>3</sub> |
| 12 <sup>3</sup> T9                                  | 1 | 0.42  | <i>P312</i>               | Fe <sub>24</sub> N <sub>10</sub>                                                       |
| <b>sve</b>                                          | 1 | 0.4   | <i>P4/mbm</i>             | CaLi <sub>2</sub> (Li <sub>0.12</sub> Mn <sub>1.88</sub> )N <sub>2</sub>               |
| 9,10T2663                                           | 1 | 0.4   | <i>P4/nbm</i>             | Ge <sub>4</sub> Sr <sub>11</sub> N <sub>6</sub>                                        |
| 7 <sup>2</sup> ,8,10T3                              | 1 | 0.36  | <i>Cc</i>                 | Sr <sub>8</sub> Ge <sub>2</sub> (GeN <sub>4</sub> )                                    |
| 7 <sup>4</sup> ,8,10T1                              | 1 | 0.35  | <i>P2/m</i>               | Ba <sub>14</sub> Cu <sub>2</sub> In <sub>4</sub> N <sub>7</sub>                        |
| <b>whb</b>                                          | 1 | 0.33  | <i>P4<sub>2</sub>/nmc</i> | LiBa <sub>2</sub> N                                                                    |
| 5,6 <sup>3</sup> ,7 <sup>2</sup> ,8 <sup>2</sup> T3 | 1 | 0.32  | <i>C2/m</i>               | Ba <sub>19</sub> In <sub>9</sub> N <sub>9</sub>                                        |
| <b>tca</b>                                          | 1 | 0.27  | <i>R-3c</i>               | Na <sub>7</sub> Ba <sub>14</sub> CaN <sub>6</sub>                                      |
| <b>tcl-4,8-</b><br>P3 <sub>2</sub> 21               | 1 | 0.25  | <i>R-3m</i>               | Sr <sub>0.86</sub> Ba <sub>2.14</sub> BiN                                              |
| 7,8,9T14                                            | 1 | 0.19  | <i>P-1</i>                | Na <sub>17</sub> Ba <sub>14</sub> CaN <sub>6</sub>                                     |
| 9 <sup>2</sup> T1978                                | 1 | 0.17  | <i>C2/m</i>               | Na <sub>21</sub> Ba <sub>14</sub> CaN <sub>6</sub>                                     |
| <b>ecf</b>                                          | 1 | 0.16  | <i>P6<sub>3</sub>/mmc</i> | Dy <sub>2</sub> Fe <sub>17</sub> N <sub>3</sub>                                        |
| 8,11T560                                            | 1 | 0.125 | <i>A2/m</i>               | Nd <sub>3</sub> Fe <sub>28.2</sub> Ti <sub>0.8</sub> N <sub>4</sub>                    |

Table S4. Topological types of silicon substructures in inorganic silicides.

| Topological type | Occurrence |             | Si/M ratio | Space group               | Silicides                                                                                            |
|------------------|------------|-------------|------------|---------------------------|------------------------------------------------------------------------------------------------------|
| <b>hcp</b>       | 263        | 175         | 0.5        | <i>Pnma</i>               | M(1)M(2)Si<br>M(1) = <i>d</i> -metals, Ln, AEM, U;<br>M(2) = <i>d</i> -metals, AEM, Al               |
|                  |            |             |            |                           | M(1)M(2) <sub>1-x</sub> M(3) <sub>x</sub> Si<br>M(1) = Mn, Co, Ni;<br>M(2), M(3) = Mn, Ti, Sc, Lu, V |
|                  |            |             |            |                           | M <sub>2</sub> Si M = <i>d</i> -metals, AEM, Eu                                                      |
|                  |            |             |            |                           | Sr <sub>1.25</sub> Ca <sub>0.75</sub> Si; Al <sub>0.45</sub> Mg <sub>1.55</sub> Si                   |
|                  |            |             |            |                           | Co <sub>2</sub> MnTiSi <sub>2</sub>                                                                  |
|                  |            |             |            | <i>P6<sub>3</sub>/mmc</i> | M(1)M(2)Si<br>M(1) = Ln, <i>d</i> -metals, AEM, Be;<br>M(2) = <i>d</i> -metals                       |
|                  |            |             |            |                           | Ni <sub>2</sub> Si                                                                                   |
|                  |            |             |            | <i>P6<sub>3</sub>/mcm</i> | Gd(Ti <sub>1-x</sub> Mn <sub>x</sub> )Si                                                             |
|                  |            |             |            | <i>Pbnm</i>               | MCuSi M = Ti, Zr, Hf                                                                                 |
|                  |            |             |            |                           | M <sub>2</sub> Si M = Ca, Ni                                                                         |
|                  |            |             |            | <i>Pnam</i>               | TiNiSi; HfWSi                                                                                        |
|                  |            |             |            |                           | Co <sub>2</sub> Si                                                                                   |
|                  |            |             |            | <i>P6<sub>3</sub>mc</i>   | YAuSi                                                                                                |
|                  |            |             |            | <i>P6<sub>3</sub>22</i>   | Ni <sub>2</sub> Si                                                                                   |
|                  |            |             |            | <i>P-3m1</i>              | Fe <sub>2</sub> Si                                                                                   |
|                  |            | <i>Pbca</i> | PtSbSi     |                           |                                                                                                      |
|                  |            | 60          | 0.6        | <i>P6<sub>3</sub>/mcm</i> | M <sub>5</sub> Si <sub>3</sub> M = <i>d</i> -metals, Ln                                              |
|                  |            |             |            |                           | M(1) <sub>2</sub> M(2) <sub>3</sub> Si <sub>3</sub> M = <i>d</i> -metals                             |
|                  |            |             |            |                           | M(1) <sub>5-x</sub> M(2) <sub>x</sub> Si <sub>3</sub> M = <i>d</i> -metals                           |
|                  |            |             |            |                           | M(1)M(2) <sub>4</sub> Si <sub>3</sub><br>M(1) = <i>d</i> -metals, Eu;<br>M(2) = <i>d</i> -metals, Gd |
|                  |            |             |            |                           | M(1) <sub>5</sub> M(2) <sub>5</sub> Si <sub>6</sub> M = <i>d</i> -metals                             |
|                  |            |             |            |                           | M(1) <sub>7</sub> M(2) <sub>3</sub> Si <sub>6</sub><br>M(1) = V, Fe, Gd;<br>M(2) = Ta, Mn, Pr        |
|                  |            |             |            |                           | (Sc <sub>10-x</sub> M <sub>x</sub> )Si <sub>6</sub> M = Fe, Y                                        |
|                  |            |             |            |                           | <i>Ccmm</i> Mn <sub>5</sub> Si <sub>3</sub>                                                          |
|                  |            | 14          | 0.67       | <i>P-3m1</i>              | MA <sub>2</sub> Si <sub>2</sub> M = Ln, AEM, Y                                                       |
|                  |            |             |            |                           | Rh <sub>3</sub> Si <sub>2</sub>                                                                      |
|                  |            |             |            | <i>P6<sub>3</sub>/mmc</i> | M <sub>3</sub> Si <sub>2</sub> M = Rh, Ir                                                            |
|                  |            | 7           | 0.33       | <i>P-3m1</i>              | Li <sub>2</sub> ZnSi                                                                                 |
|                  |            |             |            |                           | Cu <sub>3</sub> Si                                                                                   |
|                  |            |             |            | <i>P6<sub>3</sub>mc</i>   | Li <sub>2.28</sub> Mg <sub>0.72</sub> Si                                                             |
|                  |            |             |            | <i>P6<sub>3</sub>/m</i>   | Al <sub>3.39</sub> Li <sub>14.61</sub> Si <sub>6</sub>                                               |
|                  |            |             |            | <i>Cmcm</i>               | Pt <sub>8</sub> Sc <sub>4</sub> Si <sub>4</sub>                                                      |
|                  |            |             |            | <i>Pnma</i>               | Ni <sub>3</sub> Si                                                                                   |
|                  |            | 3           | 0.077      | <i>P6<sub>3</sub>/mmc</i> | M <sub>4</sub> Hf <sub>9</sub> Si M = Mo, Re                                                         |
|                  |            |             |            |                           | Hf <sub>9</sub> (HfMo <sub>3</sub> )Si                                                               |
|                  |            | 1           | 0.71       | <i>P6<sub>3</sub>/mmc</i> | Rh <sub>1.4</sub> Si                                                                                 |
|                  |            | 1           | 0.4        | <i>Pnnm</i>               | DyMn <sub>4</sub> Si <sub>2</sub>                                                                    |

|     |     |              |                                          |                           |                                                                                                   |
|-----|-----|--------------|------------------------------------------|---------------------------|---------------------------------------------------------------------------------------------------|
|     |     | 1            | 0.31                                     | <i>P-3m1</i>              | Cu <sub>3.17</sub> Si                                                                             |
|     |     | 1            | 0.18                                     | <i>P6<sub>3</sub>/mcm</i> | Ca <sub>10</sub> Pt <sub>7</sub> Si <sub>3</sub>                                                  |
| fcu | 170 | 93           | 0.5                                      | <i>P4/nmm</i>             | M(1)M(2)Si<br>M(1) = Ln, AEM, <i>d</i> -metals, Na;<br>M(2) = <i>d</i> -metals, Al, Mg            |
|     |     |              |                                          |                           | M(1)M(2) <sub>1-x</sub> M(3) <sub>x</sub> Si<br>M(1) = REM, Mn;<br>M(2), M(3) = <i>d</i> -metals  |
|     |     |              |                                          | <i>P2<sub>1</sub>3</i>    | M(1)M(2)Si<br>M(1) = AEM, REM;<br>M(2) = Ir, Pt, Pd, Rh                                           |
|     |     |              |                                          | <i>Fm-3m</i>              | (Mg <sub>2-x</sub> Mn <sub>x</sub> )Si                                                            |
|     |     |              |                                          |                           | Mg <sub>2</sub> Si                                                                                |
|     |     |              |                                          | <i>F-43m</i>              | LiMSi M = Al, Ga                                                                                  |
|     |     |              |                                          | <i>Pmmn</i>               | MMnSi M = Pr, Nd                                                                                  |
|     |     |              |                                          | <i>P-43m</i>              | Mg <sub>63</sub> BiSi <sub>32</sub>                                                               |
|     |     |              |                                          | <i>I4/mmm</i>             | Pt <sub>2</sub> Si                                                                                |
|     |     |              |                                          | <i>P4/nmm</i>             | GdLaMn <sub>2</sub> Si <sub>2</sub>                                                               |
|     |     | 36           | 0.33                                     | <i>Fm-3m</i>              | M(1) <sub>2</sub> M(2)Si<br>M(1) = <i>d</i> -metals, Li;<br>M(2) = <i>d</i> -metals, Li, Mg       |
|     |     |              |                                          |                           | Fe <sub>3-x</sub> M <sub>x</sub> Si M = V, Cr, Ni                                                 |
|     |     |              |                                          |                           | M <sub>3</sub> Si M = Mn, Fe                                                                      |
|     |     |              |                                          |                           | Fe <sub>3</sub> M <sub>3</sub> Si <sub>2</sub> M = Mn, Co                                         |
|     |     |              |                                          |                           | Co <sub>2</sub> (Cr <sub>0.2</sub> Mn <sub>0.8</sub> )Si; Co <sub>4</sub> (MnV)Si <sub>2</sub>    |
|     |     |              |                                          | <i>Pnma</i>               | M <sub>2</sub> LnSi M = Pd, Pt, Ni                                                                |
|     |     |              |                                          | <i>Pmmn</i>               | M(1) <sub>2</sub> M(2)Si<br>M(1) = Li, Ni; M(2) = AEM                                             |
|     |     |              |                                          | <i>F-43m</i>              | Co <sub>2</sub> MnSi; Mn <sub>2</sub> RuSi                                                        |
|     |     | <i>P-43m</i> | Li <sub>1.62</sub> Mg <sub>1.38</sub> Si |                           |                                                                                                   |
|     |     | 20           | 1                                        | <i>P2<sub>1</sub>3</i>    | MSi M = <i>d</i> -metals                                                                          |
|     |     |              |                                          |                           | M(1) <sub>1-x</sub> M(2) <sub>x</sub> Si M = <i>d</i> -metals                                     |
|     |     |              |                                          |                           | M(1)M(2)Si <sub>2</sub> M = <i>d</i> -metals                                                      |
|     |     | 8            | 0.25                                     | <i>P2<sub>1</sub>3</i>    | (Cr <sub>0.341</sub> Mn <sub>0.061</sub> Ni <sub>0.598</sub> ) <sub>4</sub> Si<br>M = Fe, Cu, Pd  |
|     |     |              |                                          |                           | Fe <sub>5</sub> Ni <sub>3</sub> Si <sub>2</sub> ; Cr <sub>3</sub> Ni <sub>5</sub> Si <sub>2</sub> |
|     |     |              |                                          |                           | Mn <sub>3</sub> MSi M = Co, Ir                                                                    |
|     |     |              |                                          | <i>C2/c</i>               | Ca <sub>2</sub> Ir <sub>2</sub> Si                                                                |
|     |     | 3            | 0.2                                      | <i>R-3m</i>               | M(1) <sub>2</sub> M(2) <sub>3</sub> Si<br>M(1) = Mg, Er, Pr;<br>M(2) = Ni, Rh                     |
|     |     | 2            | 0.42                                     | <i>I4/m</i>               | Pt <sub>12</sub> Si <sub>5</sub>                                                                  |
|     |     |              |                                          | <i>P4/n</i>               |                                                                                                   |
|     |     | 1            | 0.49                                     | <i>Pm-3m</i>              | Mg <sub>64</sub> BiSi <sub>32</sub>                                                               |
|     |     | 1            | 0.42                                     | <i>F-43m</i>              | Li <sub>0.9</sub> Mg <sub>1.49</sub> Si                                                           |
|     |     | 1            | 0.41                                     | <i>F-43m</i>              | Li <sub>6.78</sub> Al <sub>3.07</sub> Si <sub>4</sub>                                             |
|     |     | 1            | 0.4                                      | <i>R-3m</i>               | BaMg <sub>2</sub> Li <sub>2</sub> Si <sub>2</sub>                                                 |
|     |     | 1            | 0.39                                     | <i>F-43m</i>              | Li <sub>7.43</sub> Al <sub>2.85</sub> Si <sub>4</sub>                                             |
|     |     | 1            | 0.36                                     | <i>P-3</i>                | Ni <sub>18</sub> Pd <sub>7</sub> Si <sub>9</sub>                                                  |
|     |     | 1            | 0.035                                    | <i>Fm-3m</i>              | Zr <sub>6</sub> Zn <sub>22.915</sub> Si                                                           |

|              |    |        |                           |                                                                             |                           |                                                                                                           |                                                                              |
|--------------|----|--------|---------------------------|-----------------------------------------------------------------------------|---------------------------|-----------------------------------------------------------------------------------------------------------|------------------------------------------------------------------------------|
|              |    | 1      |                           | 0.034                                                                       | <i>Fm-3m</i>              | Ce <sub>6</sub> Mg <sub>23</sub> Si                                                                       |                                                                              |
| <b>pcu</b>   | 50 | 13     |                           | 0.22                                                                        | <i>Im-3m</i>              | Ln <sub>3</sub> Ni <sub>6</sub> Si <sub>2</sub>                                                           |                                                                              |
|              |    | 10     | 3                         | 0.33                                                                        |                           | <i>Pm-3m</i>                                                                                              | M <sub>3</sub> Si M = Ni, Nb, U                                              |
|              |    |        | 2                         |                                                                             |                           |                                                                                                           | LiAg <sub>2</sub> Si; (Fe <sub>0.5</sub> Ni <sub>0.5</sub> ) <sub>3</sub> Si |
|              |    |        | 2                         |                                                                             |                           | <i>I4/mcm</i>                                                                                             | M <sub>3</sub> Si M = Ir, U                                                  |
|              |    |        | 1                         |                                                                             |                           | <i>P4/mbm</i>                                                                                             | Pt <sub>3</sub> Si                                                           |
|              |    |        | 1                         |                                                                             |                           | <i>Fmmm</i>                                                                                               | U <sub>3</sub> Si                                                            |
|              |    |        | 1                         |                                                                             |                           | <i>C2/m</i>                                                                                               | Pt <sub>3</sub> Si                                                           |
|              |    | 5      |                           | 0.18                                                                        | <i>P4/nmm</i>             | LnNi <sub>10</sub> Si <sub>2</sub>                                                                        |                                                                              |
|              |    | 5      |                           | 0.17                                                                        | <i>P4/mmm</i>             | MPt <sub>5</sub> Si M = <i>p</i> -metals, Ag                                                              |                                                                              |
|              |    | 4      |                           | 1                                                                           | <i>Pm-3m</i>              | MSi M = Co, Ru, Rh, Os                                                                                    |                                                                              |
|              |    | 3      |                           | 0.25                                                                        |                           | <i>P4<sub>2</sub>/mnm</i>                                                                                 | MAu <sub>3</sub> Si M = Y, Gd                                                |
|              |    |        |                           |                                                                             |                           | <i>P4/mbm</i>                                                                                             | Al <sub>3.75</sub> Dy <sub>3</sub> FeMg <sub>0.25</sub> Si <sub>2</sub>      |
|              |    | 3      |                           | 0.125                                                                       | <i>Imma</i>               | M(1) <sub>3</sub> M(2) <sub>5</sub> Si<br>M(1) = Ce, La; M(2) = Pd, Pt                                    |                                                                              |
|              |    | 2      |                           | 0.053                                                                       | <i>I4/mcm</i>             | M <sub>6</sub> Fe <sub>13</sub> Si M = Pr, Nd                                                             |                                                                              |
|              |    | 1      |                           | 0.4                                                                         | <i>C2/m</i>               | Rh <sub>3</sub> Bi <sub>2</sub> Si <sub>2</sub>                                                           |                                                                              |
|              |    | 1      |                           | 0.26                                                                        | <i>P4/mbm</i>             | Al <sub>3.5</sub> FeMg <sub>0.5</sub> Yb <sub>2.71</sub> Si <sub>2</sub>                                  |                                                                              |
|              |    | 1      |                           | 0.18                                                                        | <i>Pbam</i>               | Pt <sub>7</sub> Sc <sub>4</sub> Si <sub>2</sub>                                                           |                                                                              |
| 1            |    | 0.14   | <i>I4/mcm</i>             | La <sub>5</sub> Ge <sub>2</sub> Si                                          |                           |                                                                                                           |                                                                              |
| 1            |    | 0.11   | <i>I4/mcm</i>             | Tb <sub>6</sub> Al <sub>3</sub> Si                                          |                           |                                                                                                           |                                                                              |
| <b>nin</b>   | 45 | 43     | 27                        | 0.5                                                                         | <i>P-62m</i>              | M(1)M(2)Si<br>M = <i>d</i> -metals, Ln, Li                                                                |                                                                              |
|              |    |        | 2                         |                                                                             |                           | M <sub>2</sub> Si M = Pd, Pt                                                                              |                                                                              |
|              |    |        | 2                         |                                                                             |                           | Pd <sub>2-x</sub> Mn <sub>x</sub> Si                                                                      |                                                                              |
|              |    |        | 2                         |                                                                             |                           | Ru(M <sub>0.5</sub> Zr <sub>0.5</sub> )Si M = Nb, Ta                                                      |                                                                              |
|              |    |        | 10                        |                                                                             | <i>Ima2</i>               | M(1)M(2)Si M = <i>d</i> -metals                                                                           |                                                                              |
| 2            |    | 0.6    | <i>Pbam</i>               | M <sub>5</sub> Si <sub>3</sub> M = Ru, Rh                                   |                           |                                                                                                           |                                                                              |
| <b>bcu-x</b> | 42 | 40     | 27                        | 0.33                                                                        | <i>Pm-3n</i>              | M(1) <sub>3-x</sub> M(2) <sub>x</sub> Si M = <i>d</i> -metals                                             |                                                                              |
|              |    |        | 5                         |                                                                             |                           | M <sub>3</sub> Si M = <i>d</i> -metals                                                                    |                                                                              |
|              |    |        | 3                         |                                                                             |                           | M <sub>3</sub> V <sub>3</sub> Si <sub>2</sub> M = Cr, Mo, Nb                                              |                                                                              |
|              |    |        | 2                         |                                                                             |                           | V <sub>6-x</sub> M <sub>x</sub> Si <sub>2</sub> M = Ni, Nb                                                |                                                                              |
|              |    |        | 2                         |                                                                             | <i>P4<sub>2</sub>/n</i>   | Ti <sub>3</sub> Si M = Ti, Ta                                                                             |                                                                              |
|              |    |        | 1                         |                                                                             |                           | (Nb <sub>0.6</sub> V <sub>0.4</sub> ) <sub>3</sub> Si                                                     |                                                                              |
|              |    | 1      |                           | 0.25                                                                        | <i>C2cb</i>               | Au <sub>4</sub> Si                                                                                        |                                                                              |
| 1            |    | 0.0625 | <i>Im-3m</i>              | Ce <sub>4</sub> Rh <sub>12</sub> Si                                         |                           |                                                                                                           |                                                                              |
| <b>hex</b>   | 42 | 21     | 11                        | 0.2                                                                         | <i>P6<sub>3</sub>/mmc</i> | M(1) <sub>2</sub> M(2) <sub>3</sub> Si<br>M(1) = <i>d</i> -metals, AEM, U;<br>M(2) = <i>d</i> -metals, Mg |                                                                              |
|              |    |        | 9                         |                                                                             |                           | <i>Cmmm</i>                                                                                               | MNi <sub>4</sub> Si M = REM                                                  |
|              |    |        | 1                         |                                                                             | NdNi <sub>3</sub> CoSi    |                                                                                                           |                                                                              |
|              |    | 7      | 5                         | 0.5                                                                         |                           | <i>P-6m2</i>                                                                                              | M(1)M(2)Si<br>M(1) = AEM, An;<br>M(2) = Li, Al, Au                           |
|              |    |        |                           |                                                                             |                           |                                                                                                           | 1                                                                            |
|              |    | 1      |                           |                                                                             | <i>Pnma</i>               | RhTbSi                                                                                                    |                                                                              |
|              |    | 6      |                           | 0.125                                                                       | <i>P-62m</i>              | Ln <sub>3</sub> Mn <sub>3</sub> Ga <sub>2</sub> Si                                                        |                                                                              |
| 4            |    | 0.33   | <i>P6<sub>3</sub>/mmc</i> | M(1)M(2) <sub>2</sub> Si<br>M(1) = Ca, Ti, Zn, Pt;<br>M(2) = Li, Mg, Co, Ni |                           |                                                                                                           |                                                                              |

|                      |    |    |       |                           |                                                                               |                                                                                                                  |
|----------------------|----|----|-------|---------------------------|-------------------------------------------------------------------------------|------------------------------------------------------------------------------------------------------------------|
|                      |    | 2  | 0.27  | <i>P6<sub>3</sub>/mmc</i> | Ho <sub>3</sub> Ni <sub>12</sub> Si <sub>4</sub>                              |                                                                                                                  |
|                      |    |    |       | <i>C2/c</i>               | Sc <sub>2</sub> Pt <sub>9</sub> Si <sub>3</sub>                               |                                                                                                                  |
|                      |    | 1  | 0.09  | <i>P6<sub>3</sub>/mmc</i> | Ce <sub>3</sub> Co <sub>8</sub> Si                                            |                                                                                                                  |
|                      |    | 1  | 0.083 | <i>P6<sub>3</sub>/mmc</i> | Al <sub>9</sub> Mn <sub>3</sub> Si                                            |                                                                                                                  |
| 8,12T48              | 24 |    | 0.67  | <i>P4/nmm</i>             | M(1)M(2) <sub>2</sub> Si <sub>2</sub><br>M(1) = REM, An;<br>M(2) = Ir, Pt, Au |                                                                                                                  |
| <b>xau</b>           | 24 | 22 | 21    | 0.32                      | <i>Fm-3m</i>                                                                  | M(1) <sub>6</sub> M(2) <sub>16</sub> Si <sub>7</sub><br>M(1) = <i>d</i> -metals, Mg, U;<br>M(2) = Fe, Co, Ni, Cu |
|                      |    |    | 1     |                           |                                                                               | (Mn <sub>3</sub> Cr <sub>3</sub> )Ni <sub>16</sub> Si <sub>7</sub>                                               |
|                      |    | 1  |       | 0.33                      |                                                                               | Ti <sub>18.72</sub> Ni <sub>66.85</sub> Si <sub>28</sub>                                                         |
|                      |    | 1  |       | 0.3                       |                                                                               | Mn <sub>8.3</sub> Pd <sub>14.7</sub> Si <sub>7</sub>                                                             |
| <b>tsi</b>           | 22 | 20 | 16    | 0.5                       | <i>I4<sub>1</sub>md</i>                                                       | M(1)M(2)Si<br>M(1) = REM, Th;<br>M(2) = Al, Ni, Pt                                                               |
|                      |    |    | 4     |                           |                                                                               | M(1)M(2) <sub>1-x</sub> M(3) <sub>x</sub> Si<br>M(1) = Ce, La, Pt;<br>M(2), M(3) = <i>d</i> -metals, Th          |
|                      |    | 1  |       | 0.55                      |                                                                               | LaPt <sub>0.8</sub> Si                                                                                           |
|                      |    | 1  |       | 0.53                      |                                                                               | LaPt <sub>0.9</sub> Si                                                                                           |
| <b>bnn</b>           | 21 | 16 | 11    | 0.5                       | <i>P6/mmm</i>                                                                 | M(1)M(2) <sub>3</sub> Si <sub>2</sub><br>M(1) = REM; M(2) = Rh, Ru, Ir                                           |
|                      |    |    | 3     |                           | <i>P6<sub>3</sub>/m</i>                                                       | MRu <sub>3</sub> Si <sub>2</sub> M = Y, La, Th                                                                   |
|                      |    |    | 1     |                           | Gd <sub>0.05</sub> La <sub>0.95</sub> Ru <sub>3</sub> Si <sub>2</sub>         |                                                                                                                  |
|                      |    |    | 1     |                           | <i>Cmcm</i>                                                                   | Ag <sub>2</sub> Si                                                                                               |
|                      |    | 2  |       | 0.29                      | <i>P-62m</i>                                                                  | M <sub>3</sub> Cu <sub>4</sub> Si <sub>2</sub> M = Zr, Hf                                                        |
|                      |    | 2  |       | 0.13                      | Ho <sub>3</sub> Rh <sub>9</sub> Sn <sub>3</sub> Si <sub>2</sub> M = Ho, Lu    |                                                                                                                  |
|                      |    | 1  |       | 0.4                       | <i>Pbam</i>                                                                   | Sc <sub>2</sub> Pt <sub>3</sub> Si <sub>2</sub>                                                                  |
| <b>nce</b>           | 15 | 7  | 6     | 0.5                       | <i>I4/mmm</i>                                                                 | MScSi M = REM                                                                                                    |
|                      |    |    | 1     |                           | <i>I-1</i>                                                                    | CeScSi                                                                                                           |
|                      |    | 4  |       | 0.67                      | <i>I4/mmm</i>                                                                 | M(1)M(2) <sub>2</sub> Si <sub>2</sub><br>M(1) = Sr, Ba, Er, Pu;<br>M(2) = Al, Ni, Au                             |
|                      |    | 3  |       | 0.4                       | <i>Immm</i>                                                                   | M <sub>3</sub> Al <sub>2</sub> Si <sub>2</sub> M = AEM                                                           |
|                      |    | 1  |       | 0.33                      | <i>Pnma</i>                                                                   | La <sub>3</sub> Rh <sub>3</sub> Si <sub>2</sub>                                                                  |
| <b>tcg-x</b>         | 15 | 14 |       | 0.33                      | <i>Pnma</i>                                                                   | M(1)M(2) <sub>2</sub> Si<br>M(1) = REM; M(2) = Pt, Pd                                                            |
|                      |    | 1  |       | 0.14                      |                                                                               | Au <sub>5.6</sub> Cu <sub>1.4</sub> Si                                                                           |
| 9T980                | 14 | 13 |       | 0.4                       | <i>I4/mcm</i>                                                                 | M(1)M(2) <sub>9</sub> Si <sub>4</sub><br>M(1) = REM;<br>M(2) = Fe, Co, Ni                                        |
|                      |    | 1  |       |                           |                                                                               | NdCo <sub>8</sub> (Co <sub>0.5</sub> Fe <sub>0.5</sub> )Si <sub>4</sub>                                          |
| 10T356               | 14 | 13 |       | 0.2                       | <i>I4<sub>1</sub>/amd</i>                                                     | M(1)M(2) <sub>9</sub> Si <sub>2</sub><br>M(1) = REM; M(2) = Co, Ni                                               |
|                      |    | 1  |       |                           |                                                                               | Nd(Fe <sub>0.55</sub> Co <sub>0.45</sub> ) <sub>9</sub> Si <sub>2</sub>                                          |
| 11T2                 | 11 | 6  |       | 0.27                      | <i>I-43d</i>                                                                  | Li <sub>15-x</sub> M <sub>x</sub> Si <sub>4</sub> M = Al, Mg, Zn                                                 |
|                      |    | 2  |       |                           |                                                                               | M <sub>15</sub> Si <sub>4</sub> M = Li, Cu                                                                       |
|                      |    | 2  |       |                           |                                                                               | Li <sub>12</sub> M <sub>3</sub> Si <sub>4</sub> M = Al, Mg                                                       |
|                      |    | 1  |       |                           |                                                                               | Li <sub>3.51</sub> Mg <sub>0.24</sub> Si                                                                         |
| 9 <sup>2</sup> ,12T3 | 10 |    |       | 0.42                      | <i>Fm-3m</i>                                                                  | M <sub>3</sub> Pt <sub>23</sub> Si <sub>11</sub> M = Ln, U                                                       |

|                                |    |   |       |            |                                                                                                            |
|--------------------------------|----|---|-------|------------|------------------------------------------------------------------------------------------------------------|
| <b>bcu-x-13-</b><br>$P4_2/mnm$ | 10 | 8 | 0.4   | $P4_2/mnm$ | $M(1)M(2)_4Si_2$<br>M(1) = REM, Zr;<br>M(2) = Fe, Re                                                       |
|                                |    | 2 | 0.33  | $P4_2/n$   | $M_3Si$ M = Zr, Nb                                                                                         |
| <b>crs</b>                     | 9  | 8 | 0.2   | $Fd-3m$    | $M(1)_3M(2)_2Si$<br>M(1) = d-metals, Al;<br>M(2) = Fe, Co, Ni                                              |
|                                |    | 1 | 0.23  | $F-43m$    | $Al_{13}Cr_4Si_4$                                                                                          |
| $11^2,12T12$                   | 7  | 6 | 0.5   | $Pnma$     | $MNi_5Si_3$ M = REM, U                                                                                     |
|                                |    | 1 |       |            | $Y(Rh_{0.42}Ni_{0.58})Ni_4Si_3$                                                                            |
| $10,14T78$                     | 7  |   | 0.4   | $Pnma$     | $M(1)_4M(2)Si_2$<br>M(1) = Rh, Ir; M(2) = REM                                                              |
| <b>tcm</b>                     | 6  |   | 0.44  | $R-3m$     | $M(1)_2M(2)Al_6Si_4$<br>M(1) = Gd, Tb, Dy;<br>M(2) = Pt, Au                                                |
| <b>reo</b>                     | 6  | 4 | 0.26  | $Fm-3m$    | $M_3Pd_{20}Si_6$ M = Y, Ce, Lu, U                                                                          |
|                                |    | 1 |       |            | $Ce_2Pd_{21}Si_6$                                                                                          |
|                                |    | 1 | 0.19  | $R-3m$     | $Ce_2Ni_{14}Si_3$                                                                                          |
| <b>lcy</b>                     | 5  | 3 | 1     | $P2_13$    | $MSi$ M = Cr, Mn, Ni                                                                                       |
|                                |    | 2 |       |            | $Cr_{1-x}M_xSi$ M = Mn, Ni                                                                                 |
| $7,9,12T6$                     | 5  |   | 0.23  | $I4/mmm$   | $M_{11}In_6Si_4$ M = REM                                                                                   |
| $10^2T4$                       | 4  |   | 0.5   | $Pnma$     | $Ln_3NiSi_2$                                                                                               |
| $11^2,12T13$                   | 4  |   | 0.5   | $P-6$      | $Pt_9Sc_5Si_7$ ; $Al_4Cu_2Mg_8Si_7$ ;<br>$Ba_2Yb_{0.88}Mg_{11.12}Si_7$ ;<br>$Ba_{1.9}Ca_{2.4}Mg_{9.7}Si_7$ |
| <b>tcj</b>                     | 4  | 2 | 0.4   | $Pbcm$     | $M_3Rh_2Si_2$ M = Y, Ce                                                                                    |
|                                |    | 2 | 0.39  | $P321$     | $Ni_{31}Si_{12}$ ; $Fe_{1.94}Ni_{5.81}Si_3$                                                                |
| $12^4T6$                       | 4  | 2 | 0.24  | $F-43m$    | $Li_{21}Si_5$ ; $Li_{16.942}Zn_{0.025}Si_4$                                                                |
|                                |    | 1 | 0.23  |            | $Li_{17}Si_4$                                                                                              |
|                                |    | 1 |       | $F23$      | $Li_{22}Si_5$                                                                                              |
| $13T1310$                      | 3  |   | 0.54  | $Im-3m$    | $M(1)_4M(2)_7Si_6$<br>M(1) = Sc, U; M(2) = Tc, Re, Ir                                                      |
| <b>ecu</b>                     | 3  |   | 0.5   | $Cmcm$     | $MAiSi$ M = Y, Tm, Lu                                                                                      |
| <b>feb</b>                     | 3  |   | 0.5   | $Pnma$     | $LnCoSi$                                                                                                   |
| $9,12^2T5$                     | 3  |   | 0.42  | $Fm-3m$    | $Ln_3Pt_{23}Si_{11}$                                                                                       |
| $6,11^2T1$                     | 2  |   | 0.81  | $Pnma$     | $Ru_{3.71}Si_3$                                                                                            |
|                                |    |   | 0.75  |            | $Ru_4Si_3$                                                                                                 |
| <b>sve</b>                     | 2  |   | 0.67  | $P4/mbm$   | $M_3Si_2$ M = Nb, Mo                                                                                       |
| $8,9T968$                      | 2  |   | 0.6   | $I4/mcm$   | $U_3Ga_2Si_3$                                                                                              |
|                                |    |   |       | $I4$       | $U_3Al_2Si_3$                                                                                              |
| $11,15T4$                      | 2  |   | 0.4   | $Pnma$     | $Rh_4MSi_2$ M = Y, Sc                                                                                      |
| <b>tch</b>                     | 2  |   | 0.39  | $P6_3/m$   | $Ce_6Co_{1.63}Si_3$ ; $Ce_6Ni_{1.68}Si_3$                                                                  |
| $8,12T395$                     | 2  |   | 0.38  | $P-62m$    | $Al_9FeMg_3Si_5$ ; $Al_{8.64}FeMg_{3.36}Si_5$                                                              |
| $12,13T2335$                   | 2  |   | 0.375 | $C2/c$     | $M_4Pd_4Si_3$ M = Ca, Sm                                                                                   |
| <b>cco</b>                     | 2  |   | 0.33  | $Pnma$     | $M_3Si$ M = Pd, Pt                                                                                         |
| $10,14T410$                    | 2  |   | 0.29  | $P6_3/mmc$ | $M(1)_3M(2)_{11}Si_4$<br>M(1) = Sc, Tb; M(2) = Ni, Cu                                                      |
| $10,11,12T9$                   | 2  |   | 0.24  | $Cmcm$     | $Li_{4.1}Si$                                                                                               |
| sqc7*                          | 1  |   | 0.67  | $I4/mmm$   | $LuRu_2Si_2$                                                                                               |
| $10,12T6$                      | 1  |   | 0.67  | $Pnma$     | $BaAl_2Si_2$                                                                                               |

|                                               |   |        |                           |                                                                         |
|-----------------------------------------------|---|--------|---------------------------|-------------------------------------------------------------------------|
| <b>nbo</b>                                    | 1 | 0.6    | <i>P4<sub>2</sub>/nnm</i> | Li <sub>3</sub> Ag <sub>2</sub> Si <sub>3</sub>                         |
| 10,12T2863                                    | 1 | 0.6    | <i>P2<sub>1</sub>/m</i>   | Mn <sub>5</sub> Si <sub>3</sub>                                         |
| <b>ncb</b>                                    | 1 | 0.57   | <i>I-43m</i>              | Ca <sub>3</sub> Ir <sub>4</sub> Si <sub>4</sub>                         |
| 10,11,12<br>T10                               | 1 | 0.5    | <i>P-62m</i>              | Ba <sub>5</sub> Yb <sub>2.29</sub> Mg <sub>16.71</sub> Si <sub>12</sub> |
| 10 <sup>2</sup> ,11 <sup>2</sup> ,12<br>T4    | 1 | 0.5    | <i>P-6</i>                | Ba <sub>6</sub> Mg <sub>18.16</sub> Yb <sub>1.84</sub> Si <sub>13</sub> |
| <b>tck-8,10-</b><br><b>P6<sub>3</sub>/mmc</b> | 1 | 0.5    | <i>P6<sub>3</sub></i>     | CaAlSi                                                                  |
| 8,10 <sup>2</sup> T12                         | 1 | 0.5    | <i>P3</i>                 | CaAlSi                                                                  |
| <b>sxd</b>                                    | 1 | 0.5    | <i>Pnma</i>               | NdFeSi                                                                  |
| 11,12 <sup>4</sup> T2                         | 1 | 0.48   | <i>Pm-3m</i>              | Mg <sub>64</sub> BiSi <sub>31</sub>                                     |
| 8,10 <sup>4</sup> T1                          | 1 | 0.48   | <i>P6<sub>3</sub>/m</i>   | La <sub>21</sub> Ni <sub>10.35</sub> Si <sub>15</sub>                   |
| <b>xbo</b>                                    | 1 | 0.45   | <i>Pm-3m</i>              | Fe <sub>11</sub> Si <sub>5</sub>                                        |
| 8,10 <sup>3</sup> T3                          | 1 | 0.45   | <i>P6<sub>3</sub>/m</i>   | Pr <sub>15</sub> Ni <sub>7</sub> Si <sub>10</sub>                       |
| 10 <sup>2</sup> T2412                         | 1 | 0.44   | <i>P6<sub>3</sub>/m</i>   | Ce <sub>5</sub> Ni <sub>1.85</sub> Si <sub>3</sub>                      |
| <b>tce</b>                                    | 1 | 0.44   | <i>I4/m</i>               | Nb <sub>5</sub> Cu <sub>4</sub> Si <sub>4</sub>                         |
| 10,11,14T2                                    | 1 | 0.44   | <i>Pnma</i>               | Ce <sub>2</sub> Pt <sub>7</sub> Si <sub>4</sub>                         |
| 11,13T1                                       | 1 | 0.41   | <i>Pnma</i>               | Ir <sub>3.84</sub> CuSi <sub>2</sub>                                    |
| 4,5,8T43                                      | 1 | 0.38   | <i>R-3m</i>               | Rh <sub>9</sub> Y <sub>4</sub> Si <sub>5</sub>                          |
| sqc1067                                       | 1 | 0.38   | <i>P4/mmm</i>             | Mo <sub>5</sub> Ru <sub>8</sub> Si <sub>5</sub>                         |
| 11 <sup>2</sup> T2                            | 1 | 0.38   | <i>Pnma</i>               | SrAu <sub>4.3</sub> Si <sub>2</sub>                                     |
| 11,12T2509                                    | 1 | 0.375  | <i>C2/c</i>               | Ce <sub>4</sub> Rh <sub>4</sub> Si <sub>3</sub>                         |
| <b>eca</b>                                    | 1 | 0.33   | <i>P6<sub>3</sub>/mmc</i> | Co <sub>3</sub> Si                                                      |
| 3,5,8T75                                      | 1 | 0.33   | <i>P6<sub>3</sub>/mmc</i> | YRh <sub>2</sub> Si                                                     |
| <b>mob</b>                                    | 1 | 0.33   | <i>I4<sub>1</sub>/amd</i> | CeIr <sub>2</sub> Si                                                    |
| 11T106                                        | 1 | 0.33   | <i>I-4</i>                | Nb <sub>3</sub> Si                                                      |
| <b>chb</b>                                    | 1 | 0.33   | <i>Cmcm</i>               | CeRh <sub>2</sub> Si                                                    |
| 11T770                                        | 1 | 0.33   | <i>Pnma</i>               | Ce <sub>3</sub> Rh <sub>3</sub> Si <sub>2</sub>                         |
| 9,11T300                                      | 1 | 0.33   | <i>Pnma</i>               | Ca <sub>3</sub> Ni <sub>3</sub> Si <sub>2</sub>                         |
| 8,10T2481                                     | 1 | 0.33   | <i>C2/c</i>               | GdNi <sub>8</sub> Si <sub>3</sub>                                       |
| 8,10T2479                                     | 1 | 0.31   | <i>Pbcm</i>               | Pr <sub>6</sub> Ni <sub>7</sub> Si <sub>4</sub>                         |
| 8,10T2480                                     | 1 | 0.3    | <i>P4<sub>2</sub>/nmc</i> | Eu <sub>2</sub> Ni <sub>8</sub> Si <sub>3</sub>                         |
| <b>bct-9-Cmce</b>                             | 1 | 0.29   | <i>Cmca</i>               | Tm <sub>5</sub> Sb <sub>2</sub> Si <sub>2</sub>                         |
| 13T1                                          | 1 | 0.25   | <i>Pa-3</i>               | NaAu <sub>3</sub> Si                                                    |
| 11 <sup>2</sup> T60                           | 1 | 0.25   | <i>Pnma</i>               | CuLi <sub>7</sub> Si <sub>2</sub>                                       |
| 10,12T84                                      | 1 | 0.22   | <i>Pnma</i>               | Pd <sub>9</sub> Si <sub>2</sub>                                         |
| 12T495                                        | 1 | 0.2    | <i>I4<sub>1</sub>/amd</i> | LaNi <sub>9</sub> Si <sub>2</sub>                                       |
| <b>kag</b>                                    | 1 | 0.1875 | <i>P6<sub>3</sub>/mmc</i> | Er <sub>2</sub> Fe <sub>14</sub> Si <sub>3</sub>                        |
| <b>sql</b>                                    | 1 | 0.18   | <i>C2/c</i>               | Al <sub>4.5</sub> FeSi                                                  |
| <b>dia</b>                                    | 1 | 0.14   | <i>R32</i>                | Li <sub>4</sub> Pt <sub>3</sub> Si                                      |
| <b>fcu-9-P4<sub>2</sub>/n</b>                 | 1 | 0.1    | <i>P4<sub>2</sub>/n</i>   | Mg <sub>15</sub> Ir <sub>5</sub> Si <sub>2</sub>                        |
| <b>bct</b>                                    | 1 | 0.0625 | <i>P4/nmm</i>             | Ce <sub>2</sub> Pd <sub>14</sub> Si                                     |

\*The topology name of one of the nets from the EPINET database.
